# Supplementary material for: Construction and Validation of an Immune-Related Prognostic Model Based on TP53 Status in Colorectal Cancer
Source: PubMed Central journal article supplement (PMC6895875; doi:10.3390/cancers11111722), 2019-11-04
Supplement: cancers-11-01722-s001.pdf [file cancers-11-01722-s001.pdf]

Supplementary Materials

# Construction and Validation of an Immune-Related Prognostic Model Based on TP53 Status in Colorectal Cancer

Xiaojuan Zhao <sup>1,2</sup>, Jianzhong Liu <sup>3</sup>, Shuzhen Liu <sup>1,2</sup>, Fangfang Yang <sup>1,2,\*</sup> and Erfei Chen <sup>1,2,\*</sup>

Supplementary Figures

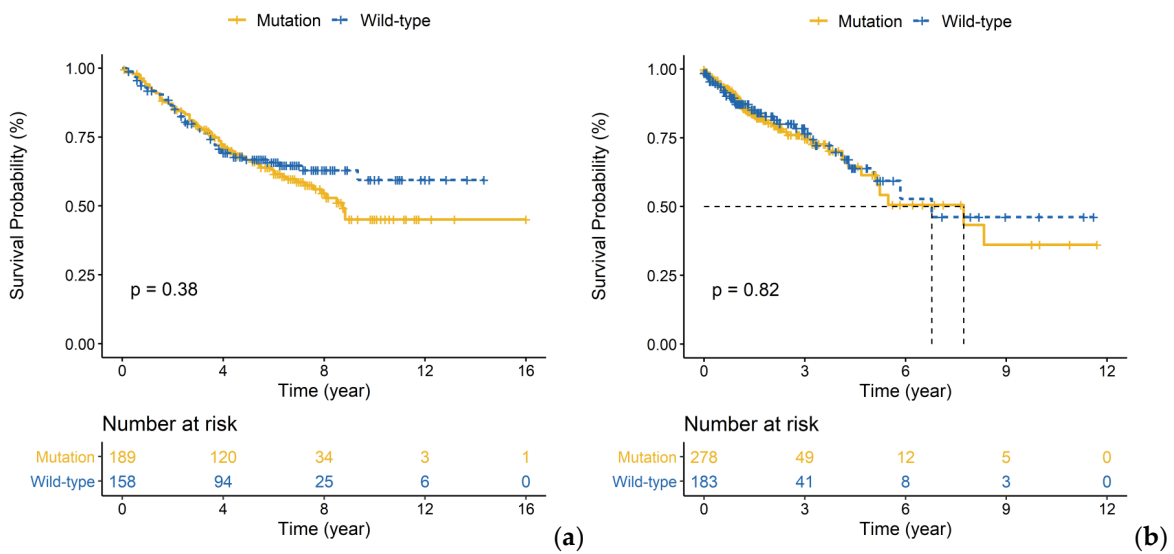

**Figure S1.** Prognostic analysis of TP53 status in CRC. According to TP53 with and without mutation, we stratify CRC patients into groups. Kaplan-Meier curves showed that there were no significant differences in groups, neither in GEO dataset (a) nor in TCGA dataset (b).

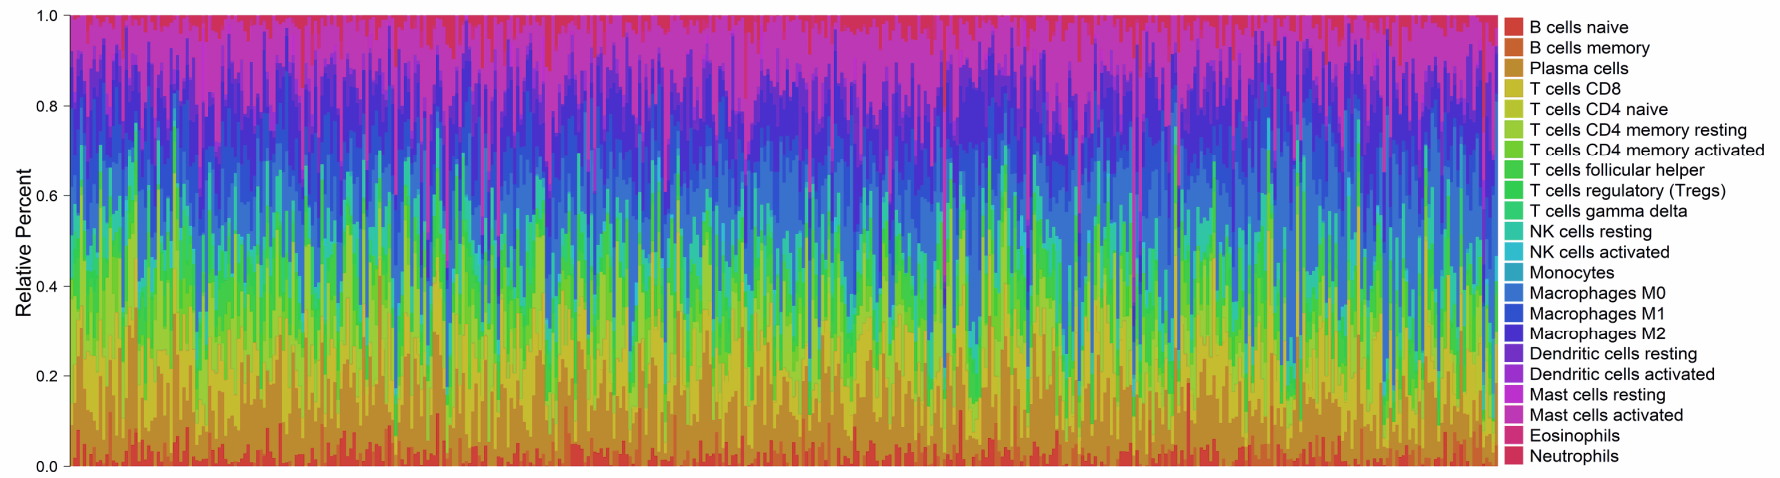

**Figure S2.** Relative proportion of immune infiltration in GEO CRC patients. CRC samples with CIBERSORT  $p < 0.05$  were selected to further investigation, the relative proportion of 22 immune cell types as shown in figure. The total of proportions of immune cell types in every CRC sample is 1.0. Obviously, the proportions of immune cells in CRC samples varies.

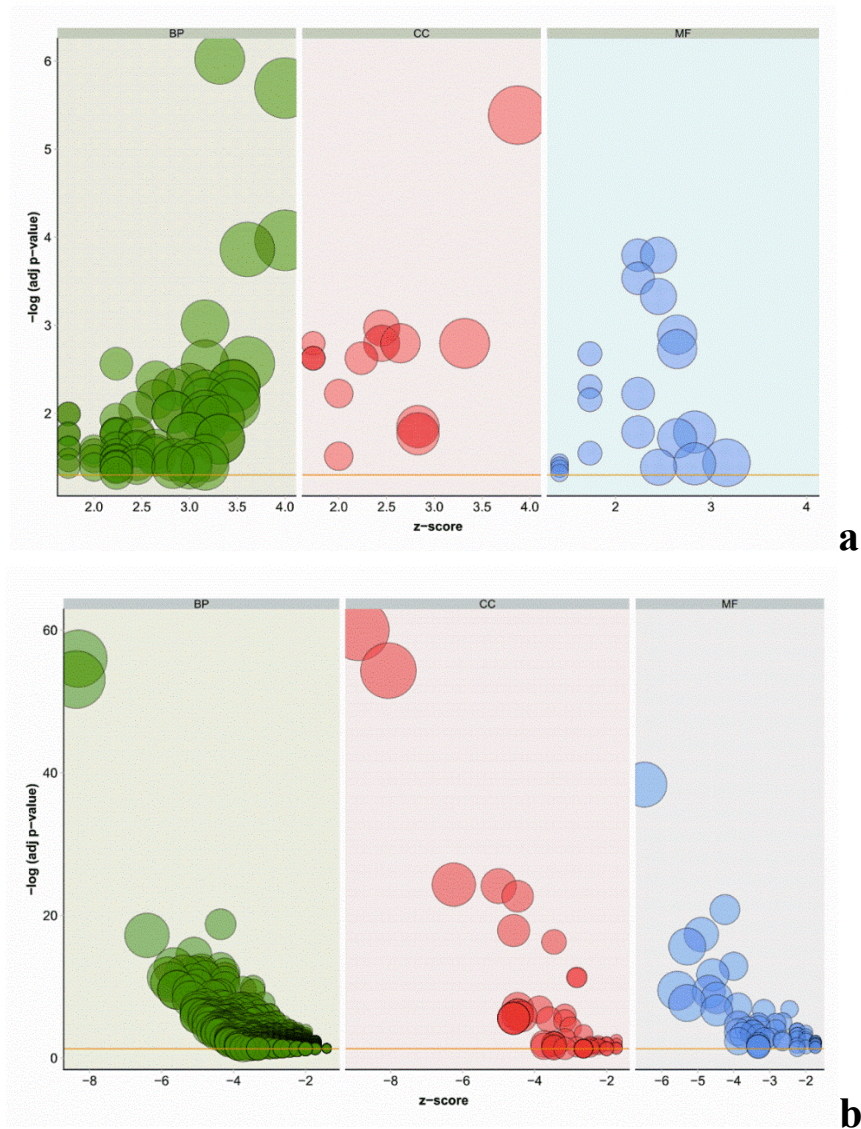

**Figure S3.** Bubble plot of GO analysis results. **a** is the bubble plot of GO analysis results for up regulation genes, **b** is the bubble plot of GO analysis results for down regulation genes. X-axis: zscore =  $(\text{up} - \text{down}) / \sqrt{\text{count}}$ , *up* and *down* are the number of assigned genes up-regulated ( $\log_{2}\text{FC} > 0$ ) in the data or down-regulated ( $\log_{2}\text{FC} < 0$ ), respectively. Count is the number of genes assigned to a term. Y-axis:  $-\log_{10}(p\text{-value})$ .

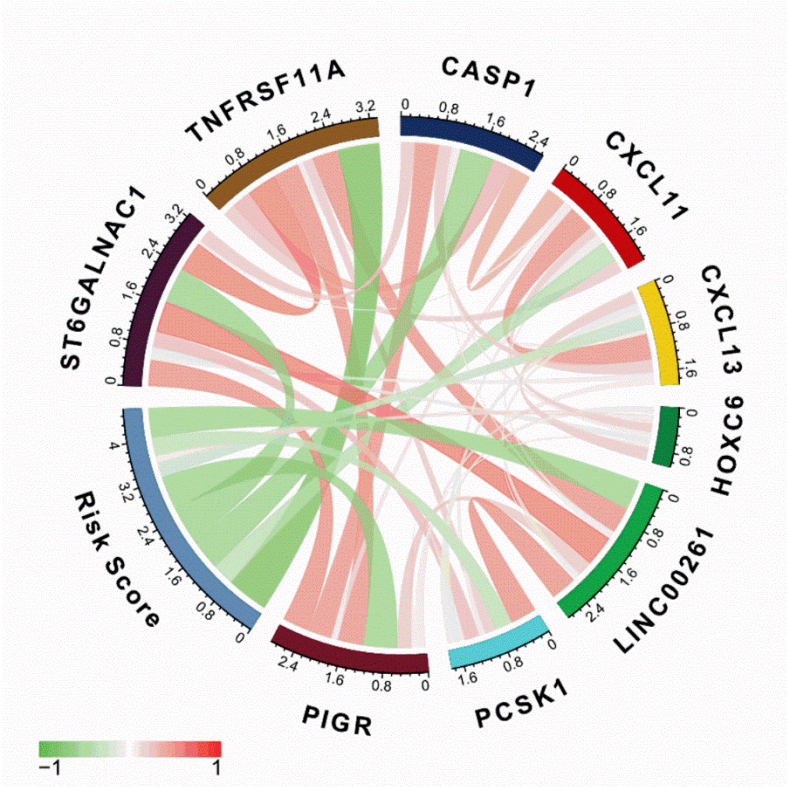

**Figure S4.** Correlation of the immunoscore with the expression of genes that constructed immunoscore. Red connecting line represents a positive correlation, green connecting line represents a negative correlation. The darker the color, represents the greater the correlation.

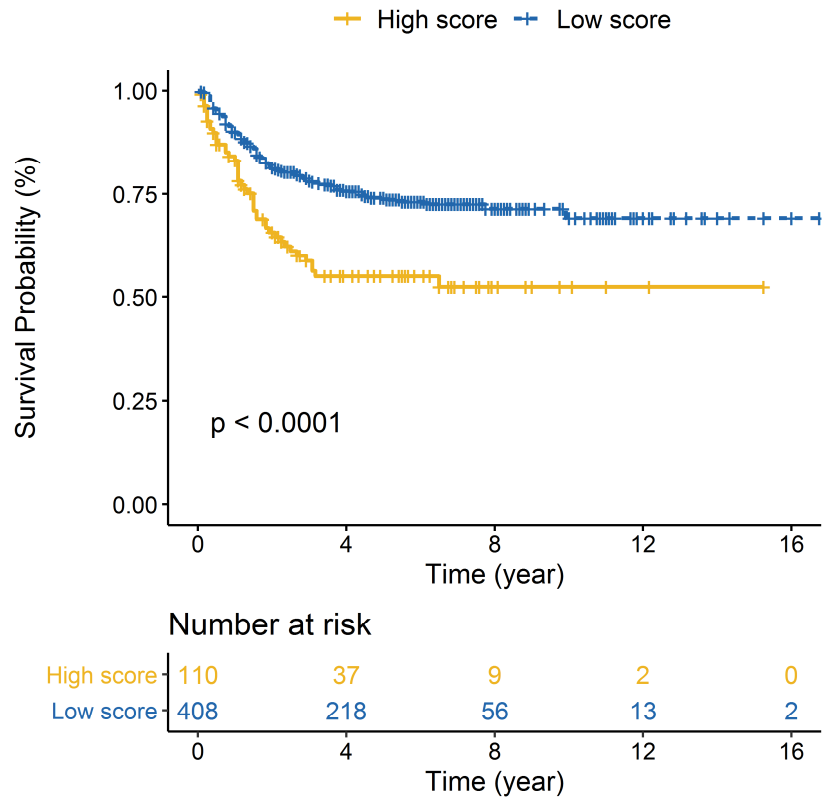

**Figure S5.** disease-free survival (DFS) analysis of immunoscore in GEO cohort. We divided the GEO CRC samples with disease-free survival information into low and high score group, using *surminer* package obtaining the optimal cut-off value. The result suggested that significant difference between low and high immunoscore group.

## Supplementary Tables

Table S1. GSEA enrichment in TP53<sup>WT</sup> CRCs.

| NAME                                              | SIZE | ES       | NES      | NOM<br><i>p</i> -Val | FDR<br><i>q</i> -Val | FWER<br><i>p</i> -Val | RANK<br>At<br>MAX | LEADING EDGE                   |
|---------------------------------------------------|------|----------|----------|----------------------|----------------------|-----------------------|-------------------|--------------------------------|
| KEGG_INTESTINAL_IMMUNE_NETWORK_FOR_IGA_PRODUCTION | 44   | -0.70353 | -2.31151 | 0                    | 0                    | 0                     | 1984              | tags=45%, list=9%, signal=50%  |
| KEGG_DRUG_METABOLISM_CYTOCHROME_P450              | 58   | -0.63391 | -2.16678 | 0                    | 0                    | 0                     | 2760              | tags=41%, list=13%, signal=47% |
| KEGG_HEMATOPOIETIC_CELL_LINEAGE                   | 83   | -0.59057 | -2.1537  | 0                    | 0                    | 0                     | 3373              | tags=39%, list=16%, signal=45% |
| KEGG_CYTOKINE_CYTOKINE_RECEPTOR_INTERACTION       | 246  | -0.48829 | -2.067   | 0                    | 3.56E-04             | 0.001                 | 3926              | tags=37%, list=18%, signal=44% |
| KEGG_METABOLISM_OF_XENOBIOTICS_BY_CYTOCHROME_P450 | 55   | -0.60057 | -2.04912 | 0                    | 2.85E-04             | 0.001                 | 2760              | tags=42%, list=13%, signal=48% |
| KEGG_GRAFT_VERSUS_HOST_DISEASE                    | 35   | -0.65688 | -2.0394  | 0                    | 4.56E-04             | 0.002                 | 1984              | tags=43%, list=9%, signal=47%  |
| KEGG_RETINOL_METABOLISM                           | 46   | -0.63174 | -2.03775 | 0                    | 3.91E-04             | 0.002                 | 2760              | tags=41%, list=13%, signal=47% |
| KEGG_LEISHMANIA_INFECTION                         | 67   | -0.57511 | -2.03133 | 0                    | 3.42E-04             | 0.002                 | 4569              | tags=49%, list=21%, signal=62% |
| KEGG_PORPHYRIN_AND_CHLOROPHYLL_METABOLISM         | 29   | -0.6758  | -2.01935 | 0                    | 3.04E-04             | 0.002                 | 2500              | tags=38%, list=12%, signal=43% |
| KEGG_APOPTOSIS                                    | 86   | -0.53917 | -1.97928 | 0                    | 2.74E-04             | 0.002                 | 3612              | tags=41%, list=17%, signal=49% |
| KEGG_STEROID_HORMONE_BIOSYNTHESIS                 | 41   | -0.62604 | -1.97467 | 0                    | 3.70E-04             | 0.003                 | 2365              | tags=37%, list=11%, signal=41% |
| KEGG_STARCH_AND_SUCROSE_METABOLISM                | 36   | -0.62028 | -1.95278 | 0                    | 4.58E-04             | 0.004                 | 5063              | tags=61%, list=23%, signal=80% |
| KEGG_P53_SIGNALING_PATHWAY                        | 66   | -0.55012 | -1.94411 | 0                    | 5.24E-04             | 0.005                 | 3041              | tags=36%, list=14%, signal=42% |
| KEGG_TOLL_LIKE_RECEPTOR_SIGNALING_PATHWAY         | 96   | -0.51639 | -1.92565 | 0                    | 0.001373             | 0.014                 | 1733              | tags=25%, list=8%, signal=27%  |
| KEGG_VALINE_LEUCINE_AND_ISOLEUCINE_DEGRADATION    | 44   | -0.58782 | -1.91123 | 0                    | 0.001903             | 0.02                  | 5367              | tags=68%, list=25%, signal=90% |
| KEGG_PRION_DISEASES                               | 34   | -0.61209 | -1.89546 | 0                    | 0.002624             | 0.03                  | 3082              | tags=44%, list=14%, signal=51% |
| KEGG_TRYPTOPHAN_METABOLISM                        | 39   | -0.58856 | -1.88988 | 0                    | 0.00286              | 0.035                 | 3946              | tags=44%, list=18%, signal=53% |
| KEGG_SPHINGOLIPID_METABOLISM                      | 34   | -0.59519 | -1.85496 | 0                    | 0.004715             | 0.061                 | 2004              | tags=32%, list=9%, signal=36%  |
| KEGG_NATURAL_KILLER_CELL_MEDIATED_CYTOTOXICITY    | 127  | -0.45224 | -1.76152 | 0                    | 0.012228             | 0.17                  | 4671              | tags=41%, list=22%, signal=52% |
| KEGG_DRUG_METABOLISM_OTHER_ENZYMES                | 37   | -0.55585 | -1.74709 | 0                    | 0.013445             | 0.208                 | 4312              | tags=43%, list=20%, signal=54% |
| KEGG_VIRAL_MYOCARDITIS                            | 65   | -0.47679 | -1.68384 | 0                    | 0.021266             | 0.361                 | 4831              | tags=38%, list=22%, signal=49% |
| KEGG_CHEMOKINE_SIGNALING_PATHWAY                  | 180  | -0.41253 | -1.68352 | 0                    | 0.020626             | 0.361                 | 4339              | tags=36%, list=20%, signal=45% |
| KEGG_PATHWAYS_IN_CANCER                           | 319  | -0.33601 | -1.43604 | 0                    | 0.101886             | 0.988                 | 4023              | tags=27%, list=19%, signal=33% |
| KEGG_MAPK_SIGNALING_PATHWAY                       | 254  | -0.35136 | -1.47549 | 0.001279             | 0.089827             | 0.965                 | 4042              | tags=27%, list=19%, signal=33% |
| KEGG_T_CELL_RECEPTOR_SIGNALING_PATHWAY            | 107  | -0.42991 | -1.64603 | 0.00142              | 0.026711             | 0.49                  | 2936              | tags=26%, list=14%, signal=30% |
| KEGG_COMPLEMENT_AND_COAGULATION_CASCADES          | 67   | -0.49834 | -1.73179 | 0.001493             | 0.014709             | 0.249                 | 5138              | tags=45%, list=24%, signal=59% |
| KEGG_NOD_LIKE_RECEPTOR_SIGNALING_PATHWAY          | 60   | -0.46986 | -1.63961 | 0.001511             | 0.028273             | 0.52                  | 4163              | tags=37%, list=19%, signal=45% |
| KEGG_JAK_STAT_SIGNALING_PATHWAY                   | 149  | -0.39972 | -1.5928  | 0.002717             | 0.043939             | 0.695                 | 2776              | tags=24%, list=13%, signal=28% |
| KEGG_FATTY_ACID_METABOLISM                        | 40   | -0.56887 | -1.80955 | 0.003115             | 0.007835             | 0.104                 | 5636              | tags=73%, list=26%, signal=98% |
| KEGG_LINOLEIC_ACID_METABOLISM                     | 23   | -0.62915 | -1.79603 | 0.003442             | 0.008586             | 0.119                 | 2256              | tags=39%, list=10%, signal=44% |
| KEGG_ALLOGRAFT_REJECTION                          | 33   | -0.56656 | -1.74241 | 0.00463              | 0.013081             | 0.221                 | 1984              | tags=33%, list=9%, signal=37%  |

|                                                               |     |          |          |          |          |       |      |                                |
|---------------------------------------------------------------|-----|----------|----------|----------|----------|-------|------|--------------------------------|
| KEGG_TYPE_I_DIABETES_MELLITUS                                 | 39  | -0.54931 | -1.74275 | 0.004831 | 0.013498 | 0.219 | 1984 | tags=36%, list=9%, signal=39%  |
| KEGG_BUTANOATE_METABOLISM                                     | 33  | -0.56786 | -1.70488 | 0.00495  | 0.01902  | 0.317 | 3224 | tags=39%, list=15%, signal=46% |
| KEGG_GLYCOSAMINOGLYCAN_DEGRADATION                            | 20  | -0.64509 | -1.75918 | 0.005102 | 0.011977 | 0.175 | 2673 | tags=25%, list=12%, signal=28% |
| KEGG_PATHOGENIC_ESCHERICHIA_COLI_INFECTION                    | 51  | -0.5028  | -1.69951 | 0.006279 | 0.019431 | 0.33  | 1733 | tags=20%, list=8%, signal=21%  |
| KEGG_PANTOTHENATE_AND_COA_BIOSYNTHESIS                        | 16  | -0.68205 | -1.75052 | 0.006757 | 0.013309 | 0.201 | 2503 | tags=44%, list=12%, signal=49% |
| KEGG_AMINO_SUGAR_AND_NUCLEOTIDE_SUGAR_METABOLISM              | 42  | -0.51033 | -1.65038 | 0.007553 | 0.026344 | 0.474 | 3207 | tags=33%, list=15%, signal=39% |
| KEGG_FC_GAMMA_R_MEDIATED_PHAGOCYTOSIS                         | 93  | -0.40422 | -1.49482 | 0.008608 | 0.081697 | 0.93  | 4167 | tags=35%, list=19%, signal=44% |
| KEGG_GLYCOLYSIS_GLUONEOGENESIS                                | 60  | -0.44283 | -1.55065 | 0.009217 | 0.060194 | 0.823 | 5745 | tags=47%, list=27%, signal=63% |
| KEGG_SYSTEMIC_LUPUS_ERYTHEMATOSUS                             | 96  | -0.427   | -1.57381 | 0.011611 | 0.051873 | 0.766 | 4856 | tags=35%, list=22%, signal=45% |
| KEGG_LEUKOCYTE_TRANSENDOTHELIAL_MIGRATION                     | 113 | -0.38544 | -1.47143 | 0.012931 | 0.089438 | 0.969 | 3348 | tags=27%, list=15%, signal=31% |
| KEGG_NITROGEN_METABOLISM                                      | 22  | -0.59299 | -1.65835 | 0.013311 | 0.025201 | 0.443 | 3148 | tags=41%, list=15%, signal=48% |
| KEGG_CYTOSOLIC_DNA_SENSING_PATHWAY                            | 51  | -0.46826 | -1.55025 | 0.015408 | 0.058888 | 0.825 | 2583 | tags=29%, list=12%, signal=33% |
| KEGG_COLORECTAL_CANCER                                        | 62  | -0.43271 | -1.50614 | 0.015432 | 0.077064 | 0.919 | 4477 | tags=39%, list=21%, signal=49% |
| KEGG_PHOSPHATIDYLINOSITOL_SIGNALING_SYSTEM                    | 74  | -0.41566 | -1.49709 | 0.017673 | 0.081724 | 0.926 | 3865 | tags=34%, list=18%, signal=41% |
| KEGG_O_GLYCAN_BIOSYNTHESIS                                    | 26  | -0.56149 | -1.63378 | 0.017699 | 0.029174 | 0.548 | 1194 | tags=31%, list=6%, signal=33%  |
| KEGG_B_CELL_RECEPTOR_SIGNALING_PATHWAY                        | 74  | -0.41108 | -1.46872 | 0.024691 | 0.088127 | 0.971 | 4450 | tags=36%, list=21%, signal=46% |
| KEGG_ALDOSTERONE_REGULATED_SODIUM_REABSORPTION                | 41  | -0.49531 | -1.55492 | 0.02589  | 0.058964 | 0.804 | 3041 | tags=29%, list=14%, signal=34% |
| KEGG_GLYCEROPHOSPHOLIPID_METABOLISM                           | 70  | -0.4031  | -1.41315 | 0.028919 | 0.113837 | 0.992 | 3506 | tags=29%, list=16%, signal=34% |
| KEGG_AMYOTROPHIC_LATERAL_SCLEROSIS_ALS                        | 51  | -0.44706 | -1.4939  | 0.030395 | 0.080688 | 0.932 | 4671 | tags=37%, list=22%, signal=47% |
| KEGG_ARACHIDONIC_ACID_METABOLISM                              | 50  | -0.44507 | -1.47353 | 0.030844 | 0.08949  | 0.965 | 1862 | tags=28%, list=9%, signal=31%  |
| KEGG_RENAL_CELL_CARCINOMA                                     | 69  | -0.40547 | -1.4426  | 0.031818 | 0.100232 | 0.985 | 4879 | tags=35%, list=23%, signal=45% |
| KEGG_FC_EPSILON_RI_SIGNALING_PATHWAY                          | 73  | -0.40819 | -1.46988 | 0.034691 | 0.088885 | 0.97  | 4163 | tags=34%, list=19%, signal=42% |
| KEGG_BETA_ALANINE_METABOLISM                                  | 22  | -0.54309 | -1.5209  | 0.035413 | 0.069876 | 0.897 | 4149 | tags=55%, list=19%, signal=67% |
| KEGG_ETHER_LIPID_METABOLISM                                   | 28  | -0.50248 | -1.48352 | 0.036244 | 0.08573  | 0.953 | 3354 | tags=39%, list=15%, signal=46% |
| KEGG_TYROSINE_METABOLISM                                      | 42  | -0.45137 | -1.46472 | 0.039185 | 0.08948  | 0.974 | 2761 | tags=29%, list=13%, signal=33% |
| KEGG_GLYCOSPHINGOLIPID_BIOSYNTHESIS_LACTO_AND_NEOLACTO_SERIES | 26  | -0.52135 | -1.52852 | 0.042414 | 0.068724 | 0.882 | 4649 | tags=50%, list=21%, signal=64% |
| KEGG_INOSITOL_PHOSPHATE_METABOLISM                            | 54  | -0.42944 | -1.44358 | 0.043741 | 0.101237 | 0.985 | 3865 | tags=35%, list=18%, signal=43% |
| KEGG_SMALL_CELL_LUNG_CANCER                                   | 84  | -0.37383 | -1.38164 | 0.043924 | 0.13738  | 0.998 | 4155 | tags=32%, list=19%, signal=40% |
| KEGG_PRIMARY_IMMUNODEFICIENCY                                 | 35  | -0.4659  | -1.43641 | 0.044925 | 0.10327  | 0.988 | 2875 | tags=31%, list=13%, signal=36% |
| KEGG_CHRONIC_MYELOID_LEUKEMIA                                 | 72  | -0.39265 | -1.40217 | 0.045455 | 0.120121 | 0.994 | 4163 | tags=31%, list=19%, signal=38% |

**Table S2.** GSEA enrichment in TP53<sup>M</sup> CRCs.

| NAME                          | SIZE | ES       | NES      | NOM<br><i>p</i> -Val | FDR<br><i>q</i> -Val | FWER<br><i>p</i> -Val | RANK<br>AT<br>MAX | LEADING EDGE                         |
|-------------------------------|------|----------|----------|----------------------|----------------------|-----------------------|-------------------|--------------------------------------|
| KEGG_DNA_REPLICATION          | 36   | 0.545324 | 1.839467 | 0                    | 0.030854             | 0.08                  | 5759              | Tags = 50%, list = 27%, signal = 68% |
| KEGG_HOMOLOGOUS_RECOMBINATION | 28   | 0.53746  | 1.748391 | 0.008264             | 0.040201             | 0.191                 | 4124              | Tags = 43%, list = 19%, signal = 53% |



**Table S3.** Differentially expressed genes between TP53<sup>M</sup> and TP53<sup>WT</sup> in CRCs.

| Symbol   | LogFC    | AveExpr  | t        | p.Value  | adj.p.Val | Symbol       | LogFC    | AveExpr  | t        | p.Value  | adj.p.Val |
|----------|----------|----------|----------|----------|-----------|--------------|----------|----------|----------|----------|-----------|
| TCN1     | 1.269601 | 6.369232 | 5.338203 | 1.69E-07 | 2.36E-05  | RARRES1      | 0.434333 | 7.20121  | 2.769761 | 0.005908 | 0.042109  |
| AGR3     | 1.217781 | 8.654876 | 5.252907 | 2.60E-07 | 3.20E-05  | CCDC68       | 0.432931 | 6.097877 | 4.136167 | 4.42E-05 | 0.001408  |
| CLCA1    | 1.147779 | 8.039989 | 3.525085 | 0.000479 | 0.007781  | CARD6        | 0.431502 | 5.556473 | 4.627327 | 5.22E-06 | 0.00031   |
| REG1A    | 1.118144 | 8.124658 | 3.449046 | 0.000631 | 0.009462  | CHP1         | 0.430562 | 8.620064 | 7.168027 | 4.51E-12 | 5.20E-09  |
| FCGBP    | 1.095105 | 8.12191  | 4.256419 | 2.67E-05 | 0.000978  | LPIN1        | 0.424874 | 6.459636 | 5.971193 | 5.76E-09 | 1.69E-06  |
| REG4     | 1.003115 | 7.346541 | 3.809755 | 0.000164 | 0.003654  | MUC1         | 0.42368  | 7.623829 | 3.509885 | 0.000507 | 0.008091  |
| MUC2     | 0.97981  | 8.82244  | 4.001248 | 7.69E-05 | 0.002137  | OSR2         | 0.421729 | 4.665589 | 3.695663 | 0.000254 | 0.004983  |
| SPINK4   | 0.973467 | 8.652496 | 3.510941 | 0.000505 | 0.008077  | C11orf92     | 0.419304 | 2.965485 | 5.335486 | 1.71E-07 | 2.38E-05  |
| LITD1    | 0.959767 | 5.456801 | 5.104959 | 5.43E-07 | 5.43E-05  | CYP2C18      | 0.417519 | 4.674835 | 4.127898 | 4.58E-05 | 0.001436  |
| PIGR     | 0.955576 | 9.949745 | 4.47657  | 1.03E-05 | 0.000504  | PAX8-AS1     | 0.417381 | 6.164945 | 2.886126 | 0.004141 | 0.033656  |
| REG1B    | 0.925315 | 6.645757 | 3.082329 | 0.002216 | 0.021933  | CD200        | 0.417348 | 5.625558 | 4.283196 | 2.38E-05 | 0.000904  |
| DEFA5    | 0.796548 | 6.246102 | 2.707237 | 0.007116 | 0.047767  | RP11-363E7.4 | 0.417145 | 4.440831 | 4.556308 | 7.19E-06 | 0.000397  |
| SLITRK6  | 0.795226 | 4.212359 | 5.020361 | 8.21E-07 | 7.41E-05  | CAPN9        | 0.415791 | 4.899448 | 3.758684 | 0.0002   | 0.004224  |
| RETNLB   | 0.783671 | 6.17199  | 3.99265  | 7.96E-05 | 0.002197  | TMEM45A      | 0.415088 | 6.463684 | 3.188159 | 0.00156  | 0.017462  |
| HEPACAM2 | 0.780764 | 6.022123 | 3.193948 | 0.00153  | 0.017241  | TLR4         | 0.413272 | 5.074302 | 4.530137 | 8.09E-06 | 0.000426  |
| CTSE     | 0.773958 | 6.685974 | 3.868154 | 0.000131 | 0.003162  | TRIM16       | 0.410211 | 6.971087 | 4.61654  | 5.48E-06 | 0.000318  |
| DUSP4    | 0.741596 | 6.113443 | 5.681021 | 2.81E-08 | 5.59E-06  | C12orf57     | 0.408571 | 9.458935 | 5.83677  | 1.21E-08 | 2.91E-06  |
| ZIC2     | 0.725346 | 4.750312 | 3.272535 | 0.001172 | 0.014448  | FGFBP1       | 0.407954 | 6.703023 | 3.614798 | 0.000344 | 0.006095  |
| FAM169A  | 0.703682 | 4.992292 | 5.466019 | 8.74E-08 | 1.41E-05  | GIF          | 0.406924 | 3.820008 | 4.040792 | 6.55E-05 | 0.001895  |
| RPL22L1  | 0.677375 | 9.477708 | 6.598473 | 1.53E-10 | 9.75E-08  | PKIB         | 0.406825 | 5.179295 | 2.859441 | 0.004497 | 0.035401  |
| PLA2G4A  | 0.673671 | 5.416364 | 3.569121 | 0.000408 | 0.006869  | FOXD1        | 0.406556 | 4.777472 | 2.833809 | 0.004865 | 0.036994  |
| SLC6A14  | 0.669019 | 5.605909 | 3.311788 | 0.001023 | 0.013081  | LIMA1        | 0.405917 | 7.784509 | 4.92777  | 1.28E-06 | 0.000111  |
| LYZ      | 0.667556 | 9.770075 | 3.927452 | 0.000103 | 0.002659  | FDXR         | 0.405524 | 5.828777 | 5.131348 | 4.77E-07 | 5.09E-05  |
| CA2      | 0.666632 | 8.099356 | 3.183645 | 0.001584 | 0.017611  | VNN1         | 0.405412 | 4.476923 | 3.357997 | 0.000871 | 0.01179   |
| NRN1     | 0.6659   | 5.640258 | 4.316726 | 2.06E-05 | 0.000818  | TLR3         | 0.403601 | 4.544338 | 5.194734 | 3.48E-07 | 4.05E-05  |
| HOXC6    | 0.657121 | 5.526046 | 3.325367 | 0.000976 | 0.012651  | PCSK1        | 0.403013 | 5.521496 | 1.737165 | 0.083234 | 0.23018   |
| PLK2     | 0.646179 | 6.872774 | 6.279585 | 1.00E-09 | 3.88E-07  | RASGRP1      | 0.401207 | 4.779856 | 4.466616 | 1.07E-05 | 0.00052   |
| SAMD5    | 0.640757 | 5.790339 | 4.459276 | 1.11E-05 | 0.000526  | CRIP1        | 0.400858 | 8.717976 | 3.105312 | 0.002055 | 0.020807  |
| ITLN1    | 0.63573  | 7.724173 | 2.151737 | 0.032099 | 0.125288  | RLN2         | -0.40267 | 4.018778 | -4.54755 | 7.48E-06 | 0.000403  |
| CXCL13   | 0.630136 | 5.43476  | 3.109828 | 0.002025 | 0.020644  | TP53RK       | -0.40271 | 7.446554 | -6.20458 | 1.54E-09 | 5.57E-07  |
| HYAL1    | 0.618335 | 5.775861 | 4.45894  | 1.11E-05 | 0.000526  | FAM217B      | -0.40515 | 7.185665 | -4.32978 | 1.95E-05 | 0.000786  |
| HSPA4L   | 0.61726  | 4.464035 | 4.481655 | 1.00E-05 | 0.000498  | TRIB3        | -0.40547 | 7.128013 | -5.05506 | 6.94E-07 | 6.68E-05  |
| CFI      | 0.616197 | 6.588913 | 5.121104 | 5.02E-07 | 5.16E-05  | CYP4F2       | -0.40574 | 5.843152 | -3.43052 | 0.000674 | 0.00983   |
| ALDH1A1  | 0.61307  | 8.016419 | 3.637419 | 0.000317 | 0.005781  | SLC26A3      | -0.40643 | 6.356646 | -1.80176 | 0.07244  | 0.211612  |
| LCN2     | 0.610664 | 11.05236 | 3.563172 | 0.000417 | 0.006994  | SLMO2        | -0.40647 | 8.36702  | -5.9376  | 6.95E-09 | 1.93E-06  |

|              |          |          |          |          |          |            |          |          |          |          |          |
|--------------|----------|----------|----------|----------|----------|------------|----------|----------|----------|----------|----------|
| SLCO1B3      | 0.609407 | 5.129574 | 2.71825  | 0.006888 | 0.046686 | ASXL1      | -0.41054 | 6.996167 | -7.40912 | 9.54E-13 | 1.48E-09 |
| RNF125       | 0.605769 | 5.376517 | 5.88919  | 9.08E-09 | 2.31E-06 | LDLRAD3    | -0.41451 | 6.750412 | -4.20634 | 3.30E-05 | 0.001154 |
| CLDN2        | 0.602566 | 6.584847 | 3.484787 | 0.000555 | 0.008551 | RNF43      | -0.41908 | 9.380016 | -3.85992 | 0.000135 | 0.003219 |
| FAS          | 0.598622 | 6.522679 | 6.279471 | 1.00E-09 | 3.88E-07 | PROSER1    | -0.42016 | 8.049286 | -5.46325 | 8.87E-08 | 1.42E-05 |
| CPS1         | 0.596691 | 3.955464 | 3.248374 | 0.001273 | 0.015225 | GGH        | -0.42103 | 9.802513 | -3.9008  | 0.000115 | 0.002867 |
| SCG5         | 0.593812 | 5.960343 | 4.26812  | 2.54E-05 | 0.000946 | VAV3       | -0.42315 | 7.614138 | -2.75678 | 0.006142 | 0.043183 |
| ADTRP        | 0.590459 | 5.703308 | 4.03665  | 6.66E-05 | 0.00192  | Y16709     | -0.4235  | 11.6614  | -4.2955  | 2.26E-05 | 0.000864 |
| MLPH         | 0.589999 | 8.497168 | 4.567472 | 6.84E-06 | 0.000382 | SYNE4      | -0.42429 | 5.995705 | -3.81231 | 0.000163 | 0.003636 |
| PLA2G2A      | 0.587976 | 9.499693 | 2.442132 | 0.015093 | 0.07723  | ACOT8      | -0.42458 | 6.415288 | -6.47933 | 3.11E-10 | 1.57E-07 |
| SPATA18      | 0.58713  | 4.669889 | 10.41009 | 2.67E-22 | 5.79E-18 | PCP4       | -0.42773 | 5.048334 | -2.39564 | 0.017114 | 0.083669 |
| TRIM22       | 0.582621 | 8.151523 | 5.009753 | 8.65E-07 | 7.77E-05 | DPM1       | -0.4302  | 10.23169 | -7.22812 | 3.07E-12 | 3.92E-09 |
| IL1R2        | 0.582506 | 6.553516 | 4.464678 | 1.08E-05 | 0.00052  | PSMA7      | -0.43362 | 9.84254  | -7.95681 | 2.45E-14 | 7.28E-11 |
| PLAC8        | 0.577719 | 9.200014 | 2.90989  | 0.003846 | 0.032044 | C8orf33    | -0.43694 | 7.999023 | -5.83815 | 1.20E-08 | 2.91E-06 |
| ST6GALNAC1   | 0.568108 | 8.898053 | 2.918016 | 0.003749 | 0.031519 | MRGBP      | -0.43872 | 6.060199 | -7.06864 | 8.47E-12 | 7.98E-09 |
| SBSPON       | 0.564092 | 4.507489 | 4.395887 | 1.46E-05 | 0.000645 | PLTP       | -0.43932 | 7.712448 | -3.84698 | 0.000142 | 0.003337 |
| FFAR4        | 0.563162 | 4.644271 | 4.306244 | 2.16E-05 | 0.000834 | DNTTIP1    | -0.43942 | 8.78904  | -6.48053 | 3.09E-10 | 1.57E-07 |
| LINC00261    | 0.555265 | 6.741698 | 3.127799 | 0.001908 | 0.019881 | TCFL5      | -0.44161 | 6.514549 | -6.20913 | 1.50E-09 | 5.52E-07 |
| COLCA2       | 0.549437 | 5.54353  | 3.576323 | 0.000397 | 0.006736 | PRSS33     | -0.44449 | 5.267091 | -3.20427 | 0.001478 | 0.016898 |
| EGLN3        | 0.541692 | 6.37259  | 5.270688 | 2.38E-07 | 2.99E-05 | MYBL2      | -0.44806 | 7.390008 | -6.01175 | 4.60E-09 | 1.40E-06 |
| TFF1         | 0.534207 | 10.24866 | 2.486143 | 0.013377 | 0.071334 | CTNBNL1    | -0.45321 | 8.159247 | -7.88234 | 4.08E-14 | 9.81E-11 |
| RPS27L       | 0.526132 | 8.046896 | 9.699066 | 7.26E-20 | 7.86E-16 | MPP1       | -0.45363 | 7.50899  | -4.60944 | 5.66E-06 | 0.000323 |
| MRAP2        | 0.520678 | 6.200264 | 4.115009 | 4.83E-05 | 0.001483 | PHACTR3    | -0.45815 | 3.782344 | -3.94555 | 9.61E-05 | 0.002521 |
| ASRGL1       | 0.518983 | 7.326307 | 4.838359 | 1.96E-06 | 0.00015  | DDX27      | -0.46118 | 8.501022 | -7.9433  | 2.69E-14 | 7.28E-11 |
| DUOX2        | 0.518406 | 7.74777  | 2.192342 | 0.02901  | 0.117094 | AP000525.9 | -0.46254 | 5.117536 | -4.50909 | 8.88E-06 | 0.000451 |
| AGR2         | 0.517969 | 10.40666 | 4.01251  | 7.34E-05 | 0.002065 | PLCB4      | -0.46764 | 8.657532 | -2.62763 | 0.008975 | 0.05553  |
| SDR16C5      | 0.513119 | 6.629785 | 2.626388 | 0.009007 | 0.055617 | PLAGL2     | -0.46904 | 6.942156 | -5.2929  | 2.12E-07 | 2.82E-05 |
| HSD17B2      | 0.510931 | 6.460643 | 2.95698  | 0.003317 | 0.02888  | ATP9A      | -0.47583 | 7.843547 | -5.38498 | 1.33E-07 | 1.94E-05 |
| CXCL11       | 0.510708 | 5.346254 | 2.409273 | 0.016498 | 0.081793 | LOC729680  | -0.48254 | 8.174807 | -5.26728 | 2.42E-07 | 3.03E-05 |
| SEMG1        | 0.510278 | 3.423634 | 4.031616 | 6.80E-05 | 0.001957 | CYP4F3     | -0.48696 | 5.71196  | -3.72569 | 0.000227 | 0.004617 |
| TNFSF9       | 0.499443 | 5.121148 | 5.116727 | 5.13E-07 | 5.21E-05 | CELP       | -0.49118 | 6.183829 | -2.90242 | 0.003937 | 0.032519 |
| LOC100505501 | 0.496974 | 4.500985 | 5.490558 | 7.69E-08 | 1.29E-05 | WASF3      | -0.4937  | 5.225273 | -3.28595 | 0.001119 | 0.013948 |
| SGPP2        | 0.491955 | 6.673975 | 4.524682 | 8.29E-06 | 0.000431 | ASCL2      | -0.49783 | 6.531319 | -3.94933 | 9.47E-05 | 0.002495 |
| REG3A        | 0.4914   | 5.83741  | 2.804364 | 0.005322 | 0.039225 | NELFCD     | -0.50065 | 9.69424  | -7.71612 | 1.25E-13 | 2.54E-10 |
| TSPAN1       | 0.490636 | 10.19203 | 4.014309 | 7.29E-05 | 0.002056 | WIF1       | -0.50096 | 3.725541 | -2.81641 | 0.00513  | 0.038225 |
| ZMAT3        | 0.490544 | 6.385927 | 7.312959 | 1.78E-12 | 2.57E-09 | SCRN1      | -0.50707 | 7.292297 | -4.30737 | 2.15E-05 | 0.000831 |
| TNFRSF11A    | 0.48893  | 6.723054 | 4.197566 | 3.42E-05 | 0.001176 | FZD10      | -0.50896 | 4.498966 | -2.41917 | 0.016063 | 0.080463 |
| GNAI1        | 0.488011 | 5.756917 | 4.271777 | 2.50E-05 | 0.000937 | MUC12      | -0.51043 | 6.99585  | -2.7002  | 0.007265 | 0.048467 |
| PTGER2       | 0.487547 | 5.380696 | 4.627356 | 5.22E-06 | 0.00031  | EPDR1      | -0.51236 | 8.064563 | -3.57653 | 0.000397 | 0.006736 |

|              |          |          |          |          |          |           |          |          |          |          |          |
|--------------|----------|----------|----------|----------|----------|-----------|----------|----------|----------|----------|----------|
| DMBT1        | 0.487508 | 8.706843 | 2.234789 | 0.026059 | 0.109087 | TTI1      | -0.51542 | 7.323327 | -8.08603 | 1.01E-14 | 4.36E-11 |
| EIF5A        | 0.484965 | 9.004405 | 4.130285 | 4.53E-05 | 0.001426 | TPX2      | -0.51801 | 9.296127 | -6.50189 | 2.72E-10 | 1.51E-07 |
| NR3C2        | 0.481446 | 7.04933  | 3.501271 | 0.000523 | 0.00825  | PMPEA1    | -0.52045 | 8.499733 | -5.11163 | 5.26E-07 | 5.32E-05 |
| MB           | 0.478914 | 5.529173 | 4.46495  | 1.08E-05 | 0.00052  | PRAP1     | -0.52264 | 8.081154 | -3.61523 | 0.000344 | 0.00609  |
| HINT3        | 0.477332 | 5.523164 | 3.446623 | 0.000636 | 0.009501 | PPP1R3D   | -0.52658 | 6.084909 | -7.71199 | 1.29E-13 | 2.54E-10 |
| SLC28A3      | 0.47502  | 4.366214 | 5.281109 | 2.26E-07 | 2.89E-05 | FOXQ1     | -0.53711 | 9.773826 | -3.9308  | 0.000102 | 0.002635 |
| RP11-38P22.2 | 0.472806 | 4.313585 | 4.080023 | 5.58E-05 | 0.001668 | CPNE1     | -0.54644 | 8.709606 | -6.71282 | 7.67E-11 | 5.13E-08 |
| KLK11        | 0.47181  | 6.268693 | 3.910383 | 0.000111 | 0.002804 | RBP2      | -0.55034 | 5.704719 | -4.55447 | 7.25E-06 | 0.0004   |
| TM4SF4       | 0.471567 | 4.983154 | 3.549565 | 0.000438 | 0.007246 | CTSV      | -0.5606  | 7.404533 | -5.9194  | 7.68E-09 | 2.03E-06 |
| CYTIP        | 0.469524 | 5.93759  | 4.380087 | 1.57E-05 | 0.000681 | GPR143    | -0.58369 | 5.742498 | -4.86976 | 1.69E-06 | 0.000136 |
| NAT1         | 0.460697 | 7.682351 | 5.166091 | 4.01E-07 | 4.47E-05 | CKMT2     | -0.58451 | 5.30282  | -3.3661  | 0.000847 | 0.011575 |
| RAB27B       | 0.459911 | 4.656846 | 5.646108 | 3.39E-08 | 6.38E-06 | LAPTM4B   | -0.59451 | 9.973948 | -5.317   | 1.88E-07 | 2.54E-05 |
| ADH6         | 0.455471 | 4.762203 | 4.361159 | 1.70E-05 | 0.000709 | QPRT      | -0.60723 | 7.653147 | -4.02642 | 6.94E-05 | 0.001986 |
| ARSJ         | 0.453229 | 4.634069 | 5.219986 | 3.07E-07 | 3.67E-05 | CEL       | -0.60954 | 7.034082 | -2.28244 | 0.023061 | 0.101191 |
| LCN15        | 0.445305 | 6.368153 | 2.319486 | 0.020941 | 0.095169 | UCA1      | -0.61236 | 6.783806 | -3.51976 | 0.000489 | 0.007862 |
| DDB2         | 0.445016 | 6.811937 | 8.181533 | 5.19E-15 | 2.81E-11 | KIAA0226L | -0.61513 | 8.597197 | -3.4772  | 0.00057  | 0.008751 |
| CDKN1A       | 0.443645 | 8.795436 | 6.313983 | 8.21E-10 | 3.35E-07 | UBE2C     | -0.6158  | 9.904635 | -7.60913 | 2.56E-13 | 4.62E-10 |
| SYTL1        | 0.442651 | 6.425098 | 4.260639 | 2.62E-05 | 0.000969 | PIPOX     | -0.62114 | 4.81597  | -4.68337 | 4.04E-06 | 0.000258 |
| ARRDC4       | 0.44036  | 7.419633 | 4.721914 | 3.38E-06 | 0.000225 | BEX2      | -0.623   | 5.832191 | -3.84032 | 0.000146 | 0.003394 |
| CASP1        | 0.440041 | 8.223464 | 3.804093 | 0.000168 | 0.003704 | COL9A3    | -0.69521 | 6.067645 | -5.03455 | 7.67E-07 | 7.15E-05 |
| FUT8         | 0.439178 | 7.189515 | 5.31976  | 1.85E-07 | 2.54E-05 | SLC35D3   | -0.75712 | 5.49688  | -3.63655 | 0.000318 | 0.005787 |
| CFD          | 0.43714  | 7.292034 | 3.34676  | 0.000906 | 0.012062 | PRAC1     | -0.76746 | 7.010654 | -2.33107 | 0.020314 | 0.093459 |
| DEFA6        | 0.436138 | 7.311844 | 1.750981 | 0.080822 | 0.226357 | GNG4      | -0.78555 | 5.313431 | -6.5472  | 2.08E-10 | 1.22E-07 |
| ANG          | 0.434936 | 7.996411 | 4.324014 | 2.00E-05 | 0.0008   | MAP7D2    | -0.89302 | 5.173364 | -4.74615 | 3.02E-06 | 0.000205 |
| TMEM71       | 0.434833 | 4.867747 | 3.508746 | 0.000509 | 0.008106 | EREG      | -0.90448 | 6.128234 | -5.93859 | 6.91E-09 | 1.93E-06 |
| TMEM263      | 0.434728 | 8.221797 | 5.449251 | 9.53E-08 | 1.47E-05 | KRT23     | -1.23793 | 7.40819  | -5.1355  | 4.67E-07 | 5.03E-05 |
| BIRC3        | 0.434581 | 6.36247  | 5.109404 | 5.31E-07 | 5.35E-05 |           |          |          |          |          |          |

**Table S4.** Differentially expressed genes between subgroups based on proportion of immune cells in CRC.

| Symbol   | LogFC    | AveExpr  | t        | p.Value  | adj.p.Val | Symbol   | LogFC    | AveExpr  | t        | p.Value  | adj.p.Val |
|----------|----------|----------|----------|----------|-----------|----------|----------|----------|----------|----------|-----------|
| CLCA1    | 2.168179 | 7.980473 | 6.861179 | 2.26E-11 | 4.45E-09  | CHN1     | -0.45599 | 6.91166  | -6.08499 | 2.49E-09 | 2.75E-07  |
| IGJ      | 2.06133  | 10.00636 | 10.62714 | 1.08E-23 | 5.82E-20  | MYH10    | -0.45753 | 5.951414 | -6.32563 | 6.08E-10 | 7.88E-08  |
| UGT2B17  | 1.705958 | 5.828082 | 6.12434  | 1.98E-09 | 2.25E-07  | MSRB3    | -0.45812 | 5.915235 | -5.72886 | 1.85E-08 | 1.53E-06  |
| ITLN1    | 1.680523 | 7.571623 | 5.964412 | 4.96E-09 | 5.00E-07  | C10orf10 | -0.45854 | 7.149695 | -5.66619 | 2.60E-08 | 2.04E-06  |
| ZG16     | 1.633529 | 7.383166 | 6.258261 | 9.06E-10 | 1.13E-07  | UBE2E2   | -0.45934 | 6.609889 | -4.25418 | 2.55E-05 | 0.000668  |
| MS4A12   | 1.457647 | 5.603321 | 5.628557 | 3.20E-08 | 2.41E-06  | EFEMP2   | -0.45992 | 7.416823 | -4.86403 | 1.59E-06 | 6.95E-05  |
| CLCA4    | 1.441808 | 5.479832 | 5.697808 | 2.19E-08 | 1.77E-06  | NEXN     | -0.46015 | 5.579004 | -3.37638 | 0.000798 | 0.010992  |
| CEACAM7  | 1.433024 | 7.773292 | 5.807085 | 1.20E-08 | 1.07E-06  | SERPINH1 | -0.46224 | 9.340522 | -6.36655 | 4.76E-10 | 6.36E-08  |
| SI       | 1.40316  | 4.769757 | 5.949863 | 5.39E-09 | 5.38E-07  | TMEM158  | -0.46264 | 7.48669  | -4.83116 | 1.86E-06 | 7.91E-05  |
| HEPACAM2 | 1.300983 | 5.929346 | 5.614053 | 3.46E-08 | 2.57E-06  | C11orf96 | -0.46292 | 9.220103 | -4.21642 | 3.00E-05 | 0.000766  |
| SPINK4   | 1.24075  | 8.676055 | 4.458448 | 1.04E-05 | 0.000324  | HMCN1    | -0.46423 | 4.617294 | -4.41255 | 1.28E-05 | 0.000383  |
| ADAMDEC1 | 1.22299  | 8.111762 | 7.539398 | 2.61E-13 | 9.92E-11  | MCAM     | -0.46553 | 7.436492 | -5.99826 | 4.09E-09 | 4.18E-07  |
| FCGBP    | 1.205576 | 8.110353 | 4.707576 | 3.34E-06 | 0.000127  | PLEK     | -0.46945 | 6.601188 | -5.70803 | 2.07E-08 | 1.69E-06  |
| ADH1C    | 1.201454 | 6.263778 | 5.686505 | 2.33E-08 | 1.86E-06  | GUCY1A3  | -0.47001 | 6.194959 | -4.27306 | 2.35E-05 | 0.000627  |
| TNFRSF17 | 1.142991 | 4.837849 | 7.877697 | 2.51E-14 | 1.26E-11  | PKD2     | -0.47268 | 6.437105 | -4.82067 | 1.96E-06 | 8.23E-05  |
| OLFM4    | 1.080172 | 10.17178 | 3.351538 | 0.000871 | 0.01182   | BCL6     | -0.47272 | 6.295671 | -7.86366 | 2.77E-14 | 1.36E-11  |
| AKR1B10  | 1.074759 | 6.780632 | 5.770289 | 1.47E-08 | 1.26E-06  | MFAP5    | -0.47297 | 5.015791 | -3.12759 | 0.001876 | 0.021522  |
| DUOX2    | 0.984501 | 7.473184 | 4.316977 | 1.95E-05 | 0.000537  | ADAMTS5  | -0.47399 | 4.879779 | -6.90705 | 1.69E-11 | 3.60E-09  |
| PLAC8    | 0.96645  | 9.180657 | 5.086416 | 5.36E-07 | 2.70E-05  | AOC3     | -0.47431 | 6.454179 | -3.60984 | 0.000341 | 0.005535  |
| REG4     | 0.959474 | 7.435246 | 3.673743 | 0.000268 | 0.004561  | PLXDC2   | -0.4752  | 5.37404  | -4.93133 | 1.15E-06 | 5.31E-05  |
| IGLL5    | 0.9479   | 8.776331 | 6.663746 | 7.79E-11 | 1.32E-08  | PLAUR    | -0.477   | 8.039195 | -6.33324 | 5.81E-10 | 7.58E-08  |
| ADTRP    | 0.94435  | 5.580979 | 7.015827 | 8.41E-12 | 1.96E-09  | CLMP     | -0.47795 | 5.651944 | -4.72326 | 3.10E-06 | 0.00012   |
| CA2      | 0.930706 | 8.060403 | 4.532441 | 7.48E-06 | 0.000248  | HSPA6    | -0.48336 | 5.814782 | -5.14606 | 3.98E-07 | 2.13E-05  |
| CA4      | 0.919263 | 5.750173 | 5.674073 | 2.50E-08 | 1.96E-06  | GUCY1B3  | -0.48411 | 6.230944 | -5.44395 | 8.57E-08 | 5.56E-06  |
| GCG      | 0.906447 | 3.851145 | 5.716421 | 1.98E-08 | 1.63E-06  | ARMCX2   | -0.48441 | 6.693687 | -4.33218 | 1.82E-05 | 0.000515  |
| PLA2G2A  | 0.901631 | 9.64481  | 3.94592  | 9.22E-05 | 0.001915  | CCDC80   | -0.48459 | 5.712352 | -4.52732 | 7.65E-06 | 0.000252  |
| DHRS9    | 0.897509 | 6.614024 | 5.701873 | 2.14E-08 | 1.74E-06  | ZNF521   | -0.48495 | 4.512763 | -5.14769 | 3.94E-07 | 2.11E-05  |
| IGHM     | 0.896282 | 7.587264 | 7.153334 | 3.44E-12 | 8.98E-10  | SELM     | -0.48507 | 8.352052 | -4.96643 | 9.69E-07 | 4.59E-05  |
| PIGR     | 0.894439 | 9.844754 | 4.3559   | 1.64E-05 | 0.000471  | PDGFC    | -0.48588 | 6.514497 | -4.37179 | 1.53E-05 | 0.000443  |
| MUC2     | 0.890907 | 8.887077 | 3.603605 | 0.000349 | 0.005632  | LUM      | -0.48725 | 8.601387 | -4.61364 | 5.16E-06 | 0.000181  |
| IGLL3P   | 0.883637 | 9.221702 | 7.210868 | 2.36E-12 | 6.63E-10  | ANGPTL2  | -0.48762 | 6.487916 | -5.61688 | 3.40E-08 | 2.54E-06  |
| PRAC1    | 0.861368 | 6.955187 | 2.705894 | 0.00707  | 0.056762  | SLIT2    | -0.48989 | 5.256438 | -3.97442 | 8.21E-05 | 0.001742  |
| NXPE4    | 0.846872 | 6.709422 | 4.726055 | 3.06E-06 | 0.000119  | MEIS1    | -0.49009 | 5.53843  | -4.63277 | 4.73E-06 | 0.000169  |
| C10orf99 | 0.839403 | 8.511049 | 3.651827 | 0.000291 | 0.004864  | SLC16A10 | -0.49094 | 4.166594 | -8.09982 | 5.18E-15 | 3.12E-12  |
| SLC26A3  | 0.82447  | 6.143063 | 3.699869 | 0.000242 | 0.004215  | CRIP2    | -0.49101 | 6.829079 | -6.39355 | 4.05E-10 | 5.52E-08  |

|          |          |          |          |          |          |          |          |          |          |          |          |
|----------|----------|----------|----------|----------|----------|----------|----------|----------|----------|----------|----------|
| KLRB1    | 0.809093 | 6.04437  | 8.657135 | 8.62E-17 | 7.46E-14 | MLLT11   | -0.49122 | 6.784981 | -5.18772 | 3.22E-07 | 1.79E-05 |
| MZB1     | 0.792798 | 6.532629 | 6.808727 | 3.15E-11 | 6.03E-09 | CST1     | -0.49389 | 6.936876 | -2.44484 | 0.014873 | 0.093398 |
| GUCA2A   | 0.782375 | 6.724013 | 4.867314 | 1.57E-06 | 6.87E-05 | FCGR2B   | -0.49426 | 5.55378  | -4.11774 | 4.55E-05 | 0.001076 |
| IGK      | 0.762328 | 7.401994 | 6.122633 | 2.00E-09 | 2.26E-07 | ZCCHC24  | -0.49526 | 7.473261 | -4.85441 | 1.67E-06 | 7.19E-05 |
| CLDN8    | 0.757986 | 3.669609 | 4.706964 | 3.35E-06 | 0.000127 | CD93     | -0.49578 | 7.372293 | -7.09872 | 4.91E-12 | 1.21E-09 |
| SPINK5   | 0.732122 | 6.184407 | 5.162867 | 3.65E-07 | 1.97E-05 | ELTD1    | -0.50143 | 6.343053 | -5.90983 | 6.75E-09 | 6.62E-07 |
| IGLV1-44 | 0.730793 | 7.164157 | 6.871803 | 2.11E-11 | 4.24E-09 | FPR2     | -0.50204 | 4.639001 | -7.58039 | 1.97E-13 | 8.38E-11 |
| LRRC19   | 0.72135  | 5.832321 | 4.329425 | 1.84E-05 | 0.000519 | AK021804 | -0.50279 | 4.817562 | -3.91187 | 0.000106 | 0.002133 |
| VSIG2    | 0.717074 | 6.41086  | 6.477521 | 2.44E-10 | 3.57E-08 | FIBIN    | -0.5042  | 5.478587 | -5.47136 | 7.41E-08 | 4.96E-06 |
| CHP2     | 0.716282 | 6.387688 | 4.786238 | 2.31E-06 | 9.28E-05 | GLIS2    | -0.50437 | 6.283055 | -5.64538 | 2.92E-08 | 2.25E-06 |
| RETNLB   | 0.693005 | 6.141621 | 3.689338 | 0.000252 | 0.004342 | GPNMB    | -0.50442 | 6.519792 | -4.23018 | 2.83E-05 | 0.000727 |
| CXCL14   | 0.688304 | 7.600141 | 4.651572 | 4.33E-06 | 0.000156 | APOD     | -0.50565 | 6.809785 | -3.01676 | 0.002699 | 0.028347 |
| HSD17B2  | 0.686174 | 6.367727 | 3.997565 | 7.47E-05 | 0.001625 | IL1RN    | -0.50899 | 4.960362 | -9.34788 | 4.15E-19 | 5.79E-16 |
| TRBC1    | 0.681992 | 7.793808 | 7.071769 | 5.86E-12 | 1.38E-09 | TIMP2    | -0.51071 | 8.886353 | -5.23757 | 2.50E-07 | 1.42E-05 |
| DNASE1L3 | 0.667175 | 4.842545 | 9.344877 | 4.25E-19 | 5.79E-16 | EMILIN1  | -0.51122 | 6.878459 | -5.15804 | 3.74E-07 | 2.02E-05 |
| IGLC1    | 0.662883 | 7.91371  | 7.637115 | 1.34E-13 | 5.80E-11 | CYR61    | -0.5116  | 8.74018  | -4.15059 | 3.96E-05 | 0.000973 |
| IGLJ3    | 0.657917 | 6.906963 | 6.670014 | 7.50E-11 | 1.29E-08 | ITGBL1   | -0.51279 | 4.318137 | -5.48275 | 6.98E-08 | 4.72E-06 |
| CASP1    | 0.653882 | 8.105755 | 6.067284 | 2.76E-09 | 3.01E-07 | EPYC     | -0.51356 | 3.4802   | -2.82075 | 0.005002 | 0.044467 |
| IDO1     | 0.64827  | 6.760913 | 4.82511  | 1.92E-06 | 8.09E-05 | NUAK1    | -0.51397 | 6.972483 | -5.59586 | 3.81E-08 | 2.80E-06 |
| XIST     | 0.646758 | 5.55044  | 2.538262 | 0.011475 | 0.078864 | FCGR3B   | -0.51411 | 6.219154 | -4.71176 | 3.27E-06 | 0.000126 |
| ARL14    | 0.644488 | 6.805873 | 4.688394 | 3.65E-06 | 0.000136 | DPYSL3   | -0.51679 | 5.710072 | -5.79159 | 1.31E-08 | 1.14E-06 |
| MEP1A    | 0.636435 | 8.220414 | 3.425255 | 0.00067  | 0.009525 | NDUFA4L2 | -0.51777 | 6.660577 | -5.89916 | 7.17E-09 | 6.96E-07 |
| NXPE1    | 0.610441 | 5.65505  | 4.809628 | 2.06E-06 | 8.55E-05 | CTGF     | -0.51853 | 9.48861  | -4.77126 | 2.48E-06 | 9.87E-05 |
| SULT1B1  | 0.609115 | 6.472257 | 5.19042  | 3.18E-07 | 1.77E-05 | SYNC     | -0.51903 | 4.620148 | -4.73846 | 2.89E-06 | 0.000113 |
| RNF186   | 0.606595 | 7.43968  | 4.779414 | 2.38E-06 | 9.55E-05 | PRKCDBP  | -0.52045 | 6.932353 | -5.22538 | 2.66E-07 | 1.51E-05 |
| CA1      | 0.601331 | 4.957087 | 5.639554 | 3.01E-08 | 2.29E-06 | NID2     | -0.52119 | 7.552209 | -5.14353 | 4.03E-07 | 2.15E-05 |
| CD8A     | 0.600279 | 6.28493  | 6.299043 | 7.12E-10 | 9.06E-08 | HOXC6    | -0.52149 | 5.789085 | -2.54047 | 0.011404 | 0.078548 |
| CCL28    | 0.599812 | 5.983548 | 5.298696 | 1.83E-07 | 1.08E-05 | SIPR3    | -0.52278 | 5.627023 | -9.14115 | 2.11E-18 | 2.54E-15 |
| BEST2    | 0.592625 | 4.869266 | 5.12823  | 4.35E-07 | 2.27E-05 | MMP13    | -0.52315 | 4.085849 | -7.23912 | 1.96E-12 | 5.65E-10 |
| GZMA     | 0.59243  | 6.068637 | 4.598181 | 5.54E-06 | 0.000192 | PTRF     | -0.52694 | 7.219762 | -6.00157 | 4.02E-09 | 4.12E-07 |
| SLC6A14  | 0.592278 | 5.474373 | 2.966079 | 0.003176 | 0.032035 | THY1     | -0.52695 | 8.11477  | -5.71354 | 2.01E-08 | 1.65E-06 |
| AGR3     | 0.591597 | 8.631695 | 2.465106 | 0.014068 | 0.09016  | SDC2     | -0.52765 | 6.963887 | -5.90206 | 7.06E-09 | 6.88E-07 |
| UGT2A3   | 0.587084 | 4.044609 | 3.670814 | 0.000271 | 0.004597 | CDH11    | -0.52886 | 6.496729 | -5.1761  | 3.42E-07 | 1.88E-05 |
| CD3D     | 0.580417 | 7.62578  | 8.084237 | 5.79E-15 | 3.39E-12 | PLAU     | -0.53171 | 7.615829 | -5.41994 | 9.72E-08 | 6.16E-06 |
| SCGB2A1  | 0.577077 | 4.243195 | 4.514838 | 8.10E-06 | 0.000264 | CHI3L1   | -0.5353  | 6.299641 | -5.4458  | 8.49E-08 | 5.54E-06 |
| IGKC     | 0.573048 | 6.77638  | 7.576549 | 2.03E-13 | 8.44E-11 | OSM      | -0.53583 | 5.054926 | -9.41775 | 2.39E-19 | 4.13E-16 |
| SOSTDC1  | 0.572993 | 5.776997 | 4.079856 | 5.33E-05 | 0.001223 | NOX4     | -0.53683 | 3.83374  | -7.50643 | 3.27E-13 | 1.19E-10 |
| CD38     | 0.570007 | 5.469241 | 6.57138  | 1.38E-10 | 2.18E-08 | MIR100HG | -0.54069 | 4.165852 | -4.11579 | 4.59E-05 | 0.001082 |

|              |          |          |          |          |          |            |          |          |          |          |          |
|--------------|----------|----------|----------|----------|----------|------------|----------|----------|----------|----------|----------|
| NR3C2        | 0.565826 | 6.934786 | 4.319254 | 1.93E-05 | 0.000536 | FAM101B    | -0.54106 | 7.047396 | -6.87394 | 2.08E-11 | 4.24E-09 |
| SLITRK6      | 0.562661 | 4.219466 | 3.478171 | 0.000554 | 0.008158 | CRYAB      | -0.54226 | 6.761887 | -4.72547 | 3.07E-06 | 0.000119 |
| FABP1        | 0.562088 | 8.168518 | 3.029241 | 0.002592 | 0.027531 | GXYLT2     | -0.54277 | 5.670511 | -4.62972 | 4.79E-06 | 0.00017  |
| ID1          | 0.562057 | 10.45824 | 3.998169 | 7.46E-05 | 0.001623 | SNAI2      | -0.54497 | 6.909273 | -4.6508  | 4.35E-06 | 0.000157 |
| GCNT3        | 0.555505 | 8.476699 | 3.519046 | 0.000477 | 0.007178 | DDR2       | -0.5457  | 6.557653 | -5.44438 | 8.55E-08 | 5.56E-06 |
| CD177        | 0.552751 | 5.927165 | 4.123699 | 4.44E-05 | 0.001056 | ROR2       | -0.54686 | 4.200732 | -6.97179 | 1.12E-11 | 2.49E-09 |
| SELENBP1     | 0.551667 | 9.113696 | 3.937775 | 9.52E-05 | 0.001966 | PI15       | -0.54718 | 4.539634 | -7.22008 | 2.22E-12 | 6.32E-10 |
| CD2          | 0.549891 | 6.735446 | 6.160784 | 1.60E-09 | 1.88E-07 | HS3ST3A1   | -0.55001 | 4.789204 | -6.89549 | 1.82E-11 | 3.79E-09 |
| NAT2         | 0.548452 | 6.878861 | 4.395011 | 1.38E-05 | 0.000407 | PDGFRL     | -0.55006 | 5.302196 | -4.99995 | 8.22E-07 | 4.01E-05 |
| AKR1C3       | 0.543801 | 9.370735 | 3.695022 | 0.000247 | 0.004273 | COL5A3     | -0.5503  | 6.066116 | -9.08878 | 3.17E-18 | 3.62E-15 |
| ACE2         | 0.542036 | 6.594732 | 2.946053 | 0.003385 | 0.033441 | MNDA       | -0.55207 | 5.932943 | -4.49344 | 8.92E-06 | 0.000283 |
| SLAMF7       | 0.541998 | 5.491213 | 6.146242 | 1.75E-09 | 2.01E-07 | PCDH17     | -0.55263 | 5.886143 | -7.33187 | 1.06E-12 | 3.23E-10 |
| DUOXA2       | 0.539238 | 6.903462 | 4.12248  | 4.46E-05 | 0.00106  | TIMP1      | -0.55293 | 11.64122 | -7.14035 | 3.75E-12 | 9.54E-10 |
| KRT20        | 0.53144  | 10.13021 | 2.645815 | 0.008434 | 0.06415  | TGFB1I1    | -0.55455 | 8.30257  | -5.0675  | 5.89E-07 | 2.95E-05 |
| LGALS2       | 0.526641 | 6.216936 | 4.265434 | 2.43E-05 | 0.000641 | GJA1       | -0.55597 | 8.857674 | -5.57574 | 4.25E-08 | 3.09E-06 |
| GPR128       | 0.523711 | 4.71028  | 3.57878  | 0.000383 | 0.006069 | MAP1B      | -0.55712 | 5.70212  | -6.26221 | 8.85E-10 | 1.11E-07 |
| SLC26A2      | 0.522714 | 8.092148 | 3.082267 | 0.00218  | 0.024209 | COL8A1     | -0.55871 | 4.706207 | -6.52017 | 1.88E-10 | 2.87E-08 |
| CXCL13       | 0.522645 | 5.655877 | 2.650308 | 0.008324 | 0.063539 | IBSP       | -0.56058 | 4.149437 | -8.52236 | 2.36E-16 | 1.83E-13 |
| HSD11B2      | 0.521941 | 7.80891  | 4.197029 | 3.26E-05 | 0.000821 | RAMP1      | -0.56175 | 6.82493  | -4.90506 | 1.31E-06 | 5.87E-05 |
| GPA33        | 0.510402 | 9.429963 | 4.003485 | 7.30E-05 | 0.001593 | COL7A1     | -0.56343 | 6.099693 | -8.10404 | 5.03E-15 | 3.11E-12 |
| CASP5        | 0.50896  | 5.956474 | 4.846897 | 1.73E-06 | 7.42E-05 | SRPX       | -0.56451 | 6.365058 | -3.99408 | 7.58E-05 | 0.001645 |
| ACSM3        | 0.507112 | 5.786357 | 4.401066 | 1.35E-05 | 0.000398 | COL18A1    | -0.56612 | 6.986816 | -6.7774  | 3.84E-11 | 7.22E-09 |
| SAMD13       | 0.504288 | 6.4776   | 4.327559 | 1.86E-05 | 0.00052  | TLR2       | -0.56716 | 6.715803 | -7.27969 | 1.50E-12 | 4.44E-10 |
| CHGA         | 0.503449 | 4.899906 | 5.424704 | 9.48E-08 | 6.07E-06 | CSGALNACT1 | -0.57001 | 6.201585 | -5.74893 | 1.66E-08 | 1.40E-06 |
| LRRC31       | 0.502744 | 5.432689 | 3.718344 | 0.000226 | 0.003958 | VEGFC      | -0.57057 | 5.60409  | -7.07688 | 5.66E-12 | 1.35E-09 |
| DMBT1        | 0.496759 | 8.67449  | 2.27831  | 0.023174 | 0.124868 | FSCN1      | -0.57574 | 5.989362 | -5.36759 | 1.28E-07 | 7.93E-06 |
| RTP4         | 0.494478 | 6.442162 | 5.541672 | 5.10E-08 | 3.61E-06 | ALOX5AP    | -0.57584 | 8.292202 | -5.35947 | 1.33E-07 | 8.22E-06 |
| SLC51B       | 0.490356 | 5.370558 | 4.693436 | 3.57E-06 | 0.000134 | HTRA1      | -0.57635 | 8.418398 | -5.3897  | 1.14E-07 | 7.11E-06 |
| UGT2B15      | 0.489844 | 4.932706 | 4.890601 | 1.40E-06 | 6.24E-05 | GPR116     | -0.57656 | 6.388797 | -7.72795 | 7.15E-14 | 3.29E-11 |
| PCSK1        | 0.489453 | 5.408044 | 2.241021 | 0.02551  | 0.132793 | LGALS1     | -0.58143 | 11.20141 | -6.71864 | 5.54E-11 | 9.91E-09 |
| PPP1R14D     | 0.484493 | 7.698981 | 3.741454 | 0.000207 | 0.003681 | OSMR       | -0.58275 | 5.079199 | -7.50222 | 3.36E-13 | 1.19E-10 |
| XDH          | 0.482582 | 6.49923  | 4.301128 | 2.08E-05 | 0.000567 | FERMT2     | -0.58359 | 6.448413 | -5.45409 | 8.12E-08 | 5.35E-06 |
| LOC100293211 | 0.473704 | 4.44841  | 5.342089 | 1.46E-07 | 8.85E-06 | COL4A1     | -0.58558 | 9.801283 | -6.78237 | 3.72E-11 | 7.06E-09 |
| CES3         | 0.473329 | 6.915004 | 6.448135 | 2.92E-10 | 4.21E-08 | LOXL1      | -0.58604 | 7.141214 | -4.92425 | 1.19E-06 | 5.42E-05 |
| KLF4         | 0.46744  | 8.450087 | 4.222106 | 2.93E-05 | 0.000749 | MME        | -0.5888  | 5.276075 | -4.96313 | 9.85E-07 | 4.65E-05 |
| CXCL9        | 0.467113 | 7.445295 | 2.774342 | 0.005761 | 0.049091 | C3orf80    | -0.58953 | 3.619016 | -6.4238  | 3.38E-10 | 4.72E-08 |
| HMGCS2       | 0.464863 | 6.837775 | 2.986254 | 0.002978 | 0.030561 | COLEC12    | -0.59047 | 5.904816 | -4.52545 | 7.72E-06 | 0.000253 |
| TRAC         | 0.459949 | 7.148391 | 6.209976 | 1.20E-09 | 1.46E-07 | GPX8       | -0.592   | 6.260627 | -5.92053 | 6.36E-09 | 6.29E-07 |

|              |          |          |          |          |          |              |          |          |          |          |          |
|--------------|----------|----------|----------|----------|----------|--------------|----------|----------|----------|----------|----------|
| PAQR8        | 0.459434 | 8.023608 | 5.641476 | 2.98E-08 | 2.28E-06 | NPTX2        | -0.5924  | 5.820855 | -3.01255 | 0.002736 | 0.028638 |
| CD27         | 0.457387 | 6.258567 | 5.561881 | 4.58E-08 | 3.26E-06 | SYNM         | -0.59312 | 6.590968 | -3.11069 | 0.001985 | 0.022573 |
| CD79A        | 0.455801 | 6.162101 | 6.357069 | 5.04E-10 | 6.61E-08 | FLNA         | -0.59346 | 8.581541 | -5.50046 | 6.35E-08 | 4.34E-06 |
| NKX2-3       | 0.45516  | 5.234377 | 3.950432 | 9.05E-05 | 0.001892 | S100A12      | -0.59792 | 3.969695 | -6.75144 | 4.51E-11 | 8.28E-09 |
| SCARA5       | 0.45391  | 4.83461  | 6.937293 | 1.39E-11 | 3.05E-09 | BNIP3        | -0.59803 | 6.368108 | -3.82629 | 0.000148 | 0.002775 |
| DHRS11       | 0.45305  | 7.044123 | 3.955369 | 8.87E-05 | 0.00186  | COL4A2       | -0.60074 | 9.270984 | -6.85539 | 2.34E-11 | 4.57E-09 |
| PSMB9        | 0.4511   | 9.175771 | 5.220168 | 2.73E-07 | 1.54E-05 | MFAP2        | -0.60487 | 7.959743 | -5.53413 | 5.31E-08 | 3.75E-06 |
| DDX60        | 0.450553 | 7.338974 | 3.947892 | 9.14E-05 | 0.001906 | TAGLN        | -0.60571 | 9.220655 | -4.99872 | 8.27E-07 | 4.02E-05 |
| ISX          | 0.449315 | 6.463148 | 2.633062 | 0.008752 | 0.065694 | SPHK1        | -0.60647 | 6.289484 | -7.1929  | 2.65E-12 | 7.28E-10 |
| ATOH1        | 0.448149 | 6.034421 | 4.051438 | 5.99E-05 | 0.001346 | COL12A1      | -0.6082  | 6.673962 | -6.75508 | 4.41E-11 | 8.24E-09 |
| AQP8         | 0.447898 | 4.917102 | 2.942497 | 0.003423 | 0.033697 | ADAM12       | -0.61493 | 5.022114 | -7.99929 | 1.06E-14 | 5.90E-12 |
| LINC01207    | 0.447292 | 6.471488 | 2.799833 | 0.005332 | 0.046611 | HSD11B1      | -0.61647 | 5.555599 | -5.81619 | 1.14E-08 | 1.03E-06 |
| FRMD3        | 0.447052 | 5.256457 | 4.594469 | 5.64E-06 | 0.000195 | FBN1         | -0.61827 | 6.718912 | -5.32388 | 1.60E-07 | 9.57E-06 |
| NAT1         | 0.443209 | 7.601378 | 4.794548 | 2.22E-06 | 8.99E-05 | KIAA1462     | -0.6209  | 4.030804 | -7.43093 | 5.44E-13 | 1.77E-10 |
| SLC27A2      | 0.441792 | 7.371283 | 4.657159 | 4.22E-06 | 0.000153 | PCOLCE       | -0.62205 | 8.299987 | -5.86171 | 8.85E-09 | 8.30E-07 |
| LOC101929272 | 0.439266 | 3.766253 | 6.174242 | 1.48E-09 | 1.75E-07 | TUBB6        | -0.62345 | 8.123168 | -5.97997 | 4.54E-09 | 4.60E-07 |
| FAM3D        | 0.435642 | 9.326154 | 2.936709 | 0.003487 | 0.034165 | S100A9       | -0.62452 | 7.877019 | -5.57194 | 4.34E-08 | 3.13E-06 |
| C15orf48     | 0.434761 | 10.7604  | 3.432908 | 0.000652 | 0.009322 | COL1A1       | -0.6318  | 9.11477  | -6.66887 | 7.55E-11 | 1.29E-08 |
| BCAS1        | 0.429522 | 6.17197  | 4.26746  | 2.41E-05 | 0.000637 | SERPINB2     | -0.63236 | 3.779199 | -4.5112  | 8.23E-06 | 0.000266 |
| ST6GALNAC1   | 0.429181 | 8.866075 | 2.260301 | 0.024278 | 0.128624 | WISP1        | -0.63334 | 4.985106 | -7.42973 | 5.49E-13 | 1.77E-10 |
| PBLD         | 0.429066 | 6.299837 | 3.792608 | 0.000169 | 0.003102 | STC1         | -0.63428 | 6.054512 | -7.18119 | 2.87E-12 | 7.66E-10 |
| GZMK         | 0.428147 | 5.454539 | 3.898421 | 0.000112 | 0.002222 | POSTN        | -0.63536 | 6.357528 | -6.74494 | 4.70E-11 | 8.55E-09 |
| FFAR4        | 0.425826 | 4.604396 | 3.341142 | 0.000904 | 0.012154 | COL6A3       | -0.64233 | 10.86249 | -5.86852 | 8.52E-09 | 8.02E-07 |
| TNFRSF11A    | 0.425756 | 6.616343 | 3.565321 | 0.000402 | 0.006306 | SPARC        | -0.646   | 10.19721 | -6.25165 | 9.42E-10 | 1.17E-07 |
| LCN2         | 0.421986 | 10.84694 | 2.393761 | 0.017084 | 0.102451 | RP3-428L16.2 | -0.654   | 5.206283 | -5.0232  | 7.33E-07 | 3.60E-05 |
| AIM2         | 0.419323 | 5.067519 | 3.473235 | 0.000564 | 0.008283 | COL6A2       | -0.65589 | 7.877511 | -6.8729  | 2.10E-11 | 4.24E-09 |
| BTNL8        | 0.419171 | 5.686326 | 3.258304 | 0.001205 | 0.015427 | ITGAM        | -0.65735 | 5.997474 | -6.6329  | 9.43E-11 | 1.56E-08 |
| LYPD8        | 0.417321 | 5.435638 | 3.787306 | 0.000173 | 0.003151 | NXN          | -0.66062 | 8.123148 | -6.03325 | 3.35E-09 | 3.52E-07 |
| FAM46C       | 0.416172 | 6.638206 | 4.496025 | 8.81E-06 | 0.00028  | RPS4Y1       | -0.66253 | 8.158601 | -2.18924 | 0.029091 | 0.144585 |
| PI3          | 0.41538  | 8.528658 | 2.267987 | 0.023802 | 0.127014 | PPBP         | -0.66283 | 4.584621 | -3.11907 | 0.00193  | 0.022082 |
| LINC00261    | 0.415018 | 6.685724 | 2.388027 | 0.017349 | 0.103469 | NCF2         | -0.66421 | 6.086894 | -5.87284 | 8.32E-09 | 7.90E-07 |
| PKIB         | 0.414333 | 4.965168 | 3.007588 | 0.00278  | 0.028923 | COL3A1       | -0.66635 | 10.56359 | -5.85388 | 9.25E-09 | 8.56E-07 |
| MYO1A        | 0.413284 | 7.179771 | 3.756261 | 0.000195 | 0.003502 | ISLR         | -0.66975 | 6.88106  | -5.07752 | 5.60E-07 | 2.81E-05 |
| GPR171       | 0.41224  | 4.619028 | 4.246507 | 2.64E-05 | 0.000686 | MCEMP1       | -0.67013 | 5.355388 | -8.8125  | 2.66E-17 | 2.50E-14 |
| AHCYL2       | 0.407821 | 7.085594 | 4.174483 | 3.58E-05 | 0.000892 | TIMP3        | -0.6707  | 8.001459 | -5.87113 | 8.40E-09 | 7.94E-07 |
| CXCL11       | 0.406147 | 5.357005 | 1.926733 | 0.05464  | 0.21331  | EDNRA        | -0.68091 | 6.282576 | -6.89603 | 1.81E-11 | 3.79E-09 |
| C2orf88      | 0.405909 | 5.199966 | 3.77701  | 0.00018  | 0.003264 | TNC          | -0.69152 | 5.282072 | -6.61589 | 1.05E-10 | 1.71E-08 |
| IFI27        | 0.403539 | 10.93551 | 4.51352  | 8.14E-06 | 0.000265 | PLN          | -0.6982  | 5.175946 | -4.28026 | 2.28E-05 | 0.000611 |

|              |          |          |          |          |          |           |          |          |          |          |          |
|--------------|----------|----------|----------|----------|----------|-----------|----------|----------|----------|----------|----------|
| LINC01082    | 0.402874 | 4.979632 | 6.164021 | 1.57E-09 | 1.85E-07 | OLFML2B   | -0.70558 | 7.04361  | -6.43706 | 3.12E-10 | 4.41E-08 |
| CLIC4        | -0.40224 | 7.814057 | -4.7931  | 2.23E-06 | 9.04E-05 | RAI14     | -0.70915 | 7.404763 | -8.24277 | 1.85E-15 | 1.29E-12 |
| ZFPM2        | -0.40242 | 4.215544 | -3.57096 | 0.000394 | 0.006203 | VCAN      | -0.713   | 8.522354 | -5.47485 | 7.28E-08 | 4.88E-06 |
| HTR2B        | -0.40558 | 3.683491 | -3.29143 | 0.001075 | 0.013998 | LINC01279 | -0.7143  | 5.809662 | -4.45346 | 1.07E-05 | 0.00033  |
| THBS4        | -0.40567 | 5.91393  | -3.28781 | 0.001089 | 0.014141 | EGFL6     | -0.71499 | 5.876278 | -6.08643 | 2.47E-09 | 2.74E-07 |
| CEL          | -0.40587 | 6.745561 | -1.59488 | 0.111439 | 0.32683  | GPR84     | -0.71739 | 4.452496 | -9.41528 | 2.43E-19 | 4.13E-16 |
| EMP3         | -0.40642 | 7.950589 | -4.33767 | 1.78E-05 | 0.000505 | ENO2      | -0.72598 | 6.172705 | -6.93212 | 1.44E-11 | 3.12E-09 |
| FCN1         | -0.40754 | 4.688372 | -4.97157 | 9.45E-07 | 4.50E-05 | CCL18     | -0.72958 | 8.134946 | -4.46545 | 1.01E-05 | 0.000316 |
| MMP14        | -0.4087  | 7.194273 | -6.37077 | 4.64E-10 | 6.24E-08 | FRMD6     | -0.73022 | 6.849697 | -6.18552 | 1.39E-09 | 1.67E-07 |
| CCL7         | -0.40907 | 3.485627 | -7.18886 | 2.73E-12 | 7.38E-10 | CNN1      | -0.73107 | 7.473903 | -4.41671 | 1.26E-05 | 0.000378 |
| EML1         | -0.41129 | 4.48026  | -4.69049 | 3.62E-06 | 0.000136 | GREM1     | -0.74329 | 8.562044 | -4.08128 | 5.30E-05 | 0.001218 |
| RGS16        | -0.41134 | 5.25871  | -7.55955 | 2.28E-13 | 9.30E-11 | AEBP1     | -0.74816 | 8.396113 | -5.94243 | 5.62E-09 | 5.58E-07 |
| GLT8D2       | -0.41167 | 6.526531 | -3.83558 | 0.000143 | 0.002697 | DFNA5     | -0.7492  | 6.09652  | -8.13081 | 4.15E-15 | 2.64E-12 |
| DACT1        | -0.41259 | 6.323695 | -3.69031 | 0.000251 | 0.00433  | COL1A2    | -0.75105 | 10.56118 | -5.85602 | 9.14E-09 | 8.49E-07 |
| RBMS1        | -0.4141  | 7.649626 | -4.24532 | 2.65E-05 | 0.000688 | S100A8    | -0.75147 | 5.963796 | -7.14963 | 3.53E-12 | 9.09E-10 |
| MYADM        | -0.41423 | 8.516688 | -5.57013 | 4.38E-08 | 3.15E-06 | C5orf46   | -0.75698 | 4.584295 | -7.13799 | 3.80E-12 | 9.58E-10 |
| SELE         | -0.41438 | 4.246299 | -3.63217 | 0.000313 | 0.005171 | CYP1B1    | -0.78983 | 4.386179 | -6.60812 | 1.10E-10 | 1.78E-08 |
| CFL2         | -0.41461 | 5.439384 | -4.0306  | 6.53E-05 | 0.001446 | C5AR1     | -0.79214 | 6.606217 | -7.43698 | 5.23E-13 | 1.77E-10 |
| CCDC102B     | -0.41497 | 3.453473 | -6.19665 | 1.30E-09 | 1.57E-07 | PRRX1     | -0.79603 | 5.450366 | -7.44749 | 4.87E-13 | 1.67E-10 |
| IGFBP3       | -0.41517 | 9.024925 | -4.22042 | 2.95E-05 | 0.000754 | COL5A1    | -0.79667 | 8.395363 | -6.52271 | 1.85E-10 | 2.85E-08 |
| CHST11       | -0.41621 | 5.459138 | -5.72435 | 1.90E-08 | 1.57E-06 | ITGA5     | -0.79702 | 7.634107 | -8.14393 | 3.77E-15 | 2.48E-12 |
| ENPEP        | -0.417   | 4.086574 | -5.26549 | 2.17E-07 | 1.26E-05 | BGN       | -0.80358 | 7.317706 | -6.98969 | 9.95E-12 | 2.27E-09 |
| MEIS2        | -0.41727 | 6.31697  | -3.13347 | 0.00184  | 0.021194 | SERPINE1  | -0.80385 | 6.15877  | -7.16897 | 3.11E-12 | 8.20E-10 |
| APOE         | -0.41852 | 7.785975 | -3.86276 | 0.000129 | 0.00248  | LOX       | -0.80609 | 5.230664 | -7.76115 | 5.67E-14 | 2.73E-11 |
| DDIT4        | -0.41969 | 9.922266 | -4.63059 | 4.77E-06 | 0.00017  | PXDN      | -0.80865 | 7.698569 | -8.92323 | 1.14E-17 | 1.23E-14 |
| VGLL3        | -0.42025 | 3.846766 | -5.21561 | 2.80E-07 | 1.58E-05 | RAB31     | -0.80872 | 8.827722 | -7.08864 | 5.25E-12 | 1.26E-09 |
| FCER1G       | -0.42042 | 7.492474 | -3.66565 | 0.000276 | 0.004667 | OLR1      | -0.82029 | 3.967009 | -6.7312  | 5.12E-11 | 9.24E-09 |
| TSPYL5       | -0.42131 | 5.112526 | -4.49922 | 8.69E-06 | 0.000277 | MXRA5     | -0.82398 | 8.956648 | -6.43206 | 3.21E-10 | 4.52E-08 |
| KCNE4        | -0.42137 | 4.52278  | -5.88997 | 7.55E-09 | 7.27E-07 | FN1       | -0.82737 | 8.341462 | -7.5559  | 2.33E-13 | 9.36E-11 |
| CD14         | -0.42171 | 8.563106 | -4.1658  | 3.72E-05 | 0.000922 | INHBA     | -0.84321 | 6.479783 | -8.86952 | 1.72E-17 | 1.69E-14 |
| LOC100132891 | -0.42207 | 3.701816 | -7.10906 | 4.59E-12 | 1.14E-09 | TMEM45A   | -0.85618 | 6.674318 | -6.56797 | 1.41E-10 | 2.21E-08 |
| PFKFB3       | -0.4221  | 7.456386 | -6.56237 | 1.46E-10 | 2.27E-08 | FAP       | -0.86232 | 7.14141  | -6.44467 | 2.98E-10 | 4.24E-08 |
| CDH5         | -0.42229 | 5.993508 | -5.5058  | 6.18E-08 | 4.25E-06 | IL24      | -0.86929 | 5.034856 | -7.38674 | 7.33E-13 | 2.27E-10 |
| FGR          | -0.4226  | 5.79392  | -6.44709 | 2.93E-10 | 4.21E-08 | COL5A2    | -0.86995 | 8.992598 | -7.31353 | 1.20E-12 | 3.59E-10 |
| TSHZ3        | -0.42284 | 5.316179 | -5.81337 | 1.16E-08 | 1.04E-06 | GFPT2     | -0.87011 | 5.351724 | -8.63836 | 9.92E-17 | 8.26E-14 |
| CRISPLD1     | -0.42352 | 3.958239 | -3.9471  | 9.17E-05 | 0.00191  | TWIST1    | -0.8751  | 5.000959 | -7.6385  | 1.33E-13 | 5.80E-11 |
| COL16A1      | -0.42383 | 7.365052 | -4.76325 | 2.57E-06 | 0.000101 | SLC2A3    | -0.88241 | 7.057337 | -8.4138  | 5.28E-16 | 3.81E-13 |
| DENND5A      | -0.42575 | 7.382079 | -6.03694 | 3.28E-09 | 3.46E-07 | SFRP4     | -0.88774 | 5.788231 | -4.88793 | 1.42E-06 | 6.31E-05 |



|           |          |          |          |          |          |          |          |          |          |          |          |
|-----------|----------|----------|----------|----------|----------|----------|----------|----------|----------|----------|----------|
| SLN       | -0.426   | 4.657686 | -6.21215 | 1.19E-09 | 1.46E-07 | COMP     | -0.89132 | 5.613543 | -5.32824 | 1.57E-07 | 9.41E-06 |
| PLOD2     | -0.4262  | 8.289959 | -4.68806 | 3.66E-06 | 0.000136 | COL15A1  | -0.89471 | 9.030217 | -7.43401 | 5.33E-13 | 1.77E-10 |
| KCNJ8     | -0.42676 | 5.514642 | -5.9595  | 5.10E-09 | 5.11E-07 | SULF1    | -0.91115 | 8.966478 | -6.57204 | 1.37E-10 | 2.18E-08 |
| RGS2      | -0.42687 | 8.812261 | -3.37199 | 0.00081  | 0.011142 | GAS1     | -0.91183 | 5.099304 | -7.50253 | 3.36E-13 | 1.19E-10 |
| CXCR2     | -0.42717 | 5.309411 | -5.02641 | 7.22E-07 | 3.56E-05 | CTHRC1   | -0.9226  | 9.52073  | -6.08927 | 2.43E-09 | 2.71E-07 |
| MRC1      | -0.42866 | 7.091926 | -3.10744 | 0.002006 | 0.022758 | IL6      | -0.92918 | 6.509763 | -6.88605 | 1.93E-11 | 3.98E-09 |
| WNT5A     | -0.42965 | 7.082995 | -4.17089 | 3.64E-05 | 0.000904 | ASPN     | -0.93593 | 6.823036 | -5.67546 | 2.48E-08 | 1.96E-06 |
| MMP12     | -0.43066 | 10.15566 | -3.22106 | 0.001369 | 0.016975 | G0S2     | -0.93856 | 7.721946 | -8.87472 | 1.65E-17 | 1.69E-14 |
| LEPRE1    | -0.43293 | 6.996004 | -7.09585 | 5.01E-12 | 1.22E-09 | BCAT1    | -0.95184 | 5.503836 | -10.5585 | 1.94E-23 | 6.99E-20 |
| FZD10     | -0.43315 | 4.491039 | -2.17663 | 0.030026 | 0.14744  | PPAPDC1A | -0.9617  | 5.65332  | -7.00374 | 9.09E-12 | 2.09E-09 |
| ECM1      | -0.43468 | 7.704369 | -4.88472 | 1.44E-06 | 6.39E-05 | CXCL6    | -0.98058 | 4.592003 | -6.68129 | 6.99E-11 | 1.23E-08 |
| INHBB     | -0.43504 | 6.512212 | -4.45423 | 1.06E-05 | 0.000329 | PTGS2    | -1.0128  | 5.618164 | -6.3614  | 4.91E-10 | 6.48E-08 |
| CTSL      | -0.43557 | 8.812821 | -5.68653 | 2.33E-08 | 1.86E-06 | FNDC1    | -1.01548 | 5.923931 | -5.83128 | 1.05E-08 | 9.54E-07 |
| SOX11     | -0.4359  | 3.720546 | -8.22214 | 2.14E-15 | 1.45E-12 | PROK2    | -1.0481  | 3.475483 | -9.16364 | 1.77E-18 | 2.26E-15 |
| TNS1      | -0.4374  | 6.365517 | -5.52593 | 5.55E-08 | 3.88E-06 | SPOCK1   | -1.07214 | 6.76675  | -6.68747 | 6.73E-11 | 1.19E-08 |
| MRGPRF    | -0.43773 | 6.117013 | -3.52396 | 0.000468 | 0.007065 | MMP3     | -1.08461 | 8.504816 | -5.10877 | 4.79E-07 | 2.47E-05 |
| CD109     | -0.43774 | 4.796727 | -5.79792 | 1.26E-08 | 1.11E-06 | IL1B     | -1.08679 | 7.582593 | -8.71964 | 5.38E-17 | 4.85E-14 |
| RCN3      | -0.43878 | 6.837224 | -6.28849 | 7.57E-10 | 9.59E-08 | AQP9     | -1.09335 | 6.051277 | -10.3654 | 9.98E-23 | 3.09E-19 |
| TNFSF4    | -0.4407  | 5.089685 | -3.89176 | 0.000115 | 0.002265 | COL11A1  | -1.12891 | 5.951469 | -7.55277 | 2.38E-13 | 9.39E-11 |
| MARCO     | -0.44156 | 5.609155 | -6.46453 | 2.64E-10 | 3.84E-08 | CLEC5A   | -1.13385 | 4.032976 | -12.008  | 5.09E-29 | 3.68E-25 |
| PTX3      | -0.44353 | 3.578956 | -4.99957 | 8.24E-07 | 4.01E-05 | BCL2A1   | -1.13985 | 6.217243 | -8.48632 | 3.09E-16 | 2.30E-13 |
| ADAMTS2   | -0.44405 | 6.252564 | -6.02867 | 3.44E-09 | 3.58E-07 | THBS2    | -1.17801 | 8.516455 | -6.86209 | 2.25E-11 | 4.45E-09 |
| CCL4      | -0.44509 | 7.449986 | -4.26043 | 2.48E-05 | 0.000652 | SFRP2    | -1.24794 | 7.562794 | -5.12964 | 4.32E-07 | 2.27E-05 |
| PDGFRB    | -0.44581 | 7.409084 | -4.99516 | 8.42E-07 | 4.08E-05 | TREM1    | -1.30932 | 5.924568 | -12.2419 | 5.91E-30 | 6.39E-26 |
| PRR16     | -0.44644 | 4.648843 | -6.60563 | 1.12E-10 | 1.79E-08 | TNFAIP6  | -1.31372 | 6.139348 | -9.99192 | 2.26E-21 | 6.13E-18 |
| LAMB2     | -0.44695 | 6.522734 | -6.05979 | 2.88E-09 | 3.08E-07 | CXCL5    | -1.34835 | 4.767967 | -9.41292 | 2.48E-19 | 4.13E-16 |
| CDH13     | -0.44796 | 4.499247 | -7.90048 | 2.14E-14 | 1.13E-11 | SPP1     | -1.36223 | 6.134267 | -10.573  | 1.71E-23 | 6.99E-20 |
| CCL2      | -0.44815 | 8.053583 | -3.5473  | 0.00043  | 0.006645 | MMP1     | -1.39462 | 9.016112 | -6.48053 | 2.40E-10 | 3.53E-08 |
| LINC01094 | -0.45059 | 3.558555 | -5.63969 | 3.01E-08 | 2.29E-06 | CXCL8    | -1.49108 | 8.879283 | -9.34408 | 4.28E-19 | 5.79E-16 |
| S100A4    | -0.4516  | 10.06647 | -4.0774  | 5.38E-05 | 0.001231 | HCAR3    | -1.49569 | 5.771381 | -9.57141 | 6.98E-20 | 1.51E-16 |
| TMEM47    | -0.4524  | 6.663309 | -3.98354 | 7.91E-05 | 0.001696 | COL10A1  | -1.52065 | 6.480727 | -7.88935 | 2.31E-14 | 1.19E-11 |
| MAB21L2   | -0.45504 | 5.106904 | -3.08902 | 0.002132 | 0.023852 | MMP9     | -1.52404 | 8.202232 | -15.0703 | 7.23E-42 | 1.57E-37 |

Table S5. KEGG analysis results of immune-related DEGs in CRC.

| ID       | Description                                                   | GeneRatio | BgRatio  | pValue   | p.Adjust | qValue   | Geneid                                                                                                                                                                   | Count |
|----------|---------------------------------------------------------------|-----------|----------|----------|----------|----------|--------------------------------------------------------------------------------------------------------------------------------------------------------------------------|-------|
| hsa04974 | Protein digestion and absorption                              | 20/212    | 94/7884  | 3.74E-13 | 8.42E-11 | 7.05E-11 | COL10A1/COL11A1/COL15A1/COL5A2/COL5A1/COL1A2/COL3A1/COL6A2/COL6A3/COL1A1/COL12A1/COL4A2/MME/COL4A1/COL18A1/COL7A1/COL5A3/SLC16A10/A                                      | 20    |
| hsa04061 | Viral protein interaction with cytokine and cytokine receptor | 16/212    | 100/7884 | 7.77E-09 | 7.12E-07 | 5.96E-07 | CE2/MEP1A<br>CXCL8/CXCL5/CXCL6/IL6/IL24/CCL18/PPBP/CCL2/CCL4/CXCR2/CCL7/CXCL11/CXCL9/CXCL13/CCL28/CXCL14                                                                 | 16    |
| hsa04512 | ECM-receptor interaction                                      | 15/212    | 88/7884  | 9.49E-09 | 7.12E-07 | 5.96E-07 | SPP1/THBS2/COMP/FN1/ITGA5/COL1A2/TNC/COL6A2/COL6A3/COL1A1/COL4A2/COL4A1/IBSP/LAMB2/THBS4                                                                                 | 15    |
| hsa04657 | IL-17 signaling pathway                                       | 15/212    | 93/7884  | 2.08E-08 | 1.17E-06 | 9.78E-07 | MMP9/CXCL8/MMP1/CXCL5/IL1B/MMP3/PTGS2/CXCL6/IL6/S100A8/S100A9/MMP13/CCL2/CCL7/LCN2                                                                                       | 15    |
| hsa05144 | Malaria                                                       | 11/212    | 49/7884  | 4.88E-08 | 2.19E-06 | 1.84E-06 | CXCL8/THBS2/IL1B/IL6/COMP/TLR2/SDC2/CCL2/SELE/T                                                                                                                          | 11    |
| hsa04060 | Cytokine-cytokine receptor interaction                        | 26/212    | 294/7884 | 7.16E-08 | 2.69E-06 | 2.25E-06 | HBS4/KLRB1<br>CXCL8/CXCL5/IL1B/CXCL6/IL6/IL24/INHBA/CCL18/PPBP/OSMR/OSM/IL1RN/CCL2/CCL4/TNFSF4/INHBB/CXCR2/CCL7/CXCL11/TNFRSF11A/CD27/CXCL9/CXCL13/CCL28/CXCL14/TNFRSF17 | 26    |
| hsa04933 | AGE-RAGE signaling pathway in diabetic complications          | 14/212    | 100/7884 | 3.86E-07 | 1.24E-05 | 1.04E-05 | CXCL8/IL1B/IL6/FN1/SERPINE1/COL1A2/COL3A1/COL1A1/COL4A2/COL4A1/VEGFC/NOX4/CCL2/SELE                                                                                      | 14    |
| hsa05146 | Amoebiasis                                                    | 14/212    | 102/7884 | 4.95E-07 | 1.39E-05 | 1.17E-05 | CXCL8/IL1B/IL6/FN1/COL1A2/COL3A1/ITGAM/COL1A1/COL4A2/COL4A1/TLR2/LAMB2/CD14/MUC2                                                                                         | 14    |
| hsa04510 | Focal adhesion                                                | 19/212    | 199/7884 | 1.47E-06 | 3.66E-05 | 3.07E-05 | SPP1/THBS2/COMP/FN1/ITGA5/COL1A2/TNC/COL6A2/COL6A3/COL1A1/COL4A2/FLNA/COL4A1/VEGFC/IBSP/PDGFC/LAMB2/PDGFRB/THBS4                                                         | 19    |
| hsa04145 | Phagosome                                                     | 16/212    | 152/7884 | 2.87E-06 | 6.46E-05 | 5.41E-05 | THBS2/COMP/OLR1/ITGA5/NCF2/ITGAM/TUBB6/COLE                                                                                                                              | 16    |
| hsa05134 | Legionellosis                                                 | 9/212     | 56/7884  | 1.57E-05 | 0.000321 | 0.000269 | C12/TLR2/FCGR3B/FCGR2B/MARCO/CTSL/MRC1/CD14/THBS4<br>CXCL8/IL1B/IL6/ITGAM/BNIP3/TLR2/HSPA6/CD14/CASP1                                                                    | 9     |
| hsa00140 | Steroid hormone biosynthesis                                  | 9/212     | 60/7884  | 2.79E-05 | 0.000523 | 0.000438 | CYP1B1/HSD11B1/DHRS11/UGT2B15/HSD11B2/AKR1C3/UGT2A3/HSD17B2/UGT2B17                                                                                                      | 9     |
| hsa05133 | Pertussis                                                     | 10/212    | 76/7884  | 3.24E-05 | 0.000561 | 0.000469 | CXCL8/CXCL5/IL1B/CXCL6/IL6/ITGA5/ITGAM/CD14/CF                                                                                                                           | 10    |
| hsa05323 | Rheumatoid arthritis                                          | 11/212    | 93/7884  | 3.61E-05 | 0.000581 | 0.000486 | L2/CASP1<br>CXCL8/MMP1/CXCL5/IL1B/MMP3/CXCL6/IL6/TLR2/CCL2/CTSL/TNFRSF11A                                                                                                | 11    |
| hsa04151 | PI3K-Akt signaling pathway                                    | 23/212    | 354/7884 | 7.31E-05 | 0.001097 | 0.000919 | SPP1/THBS2/IL6/COMP/FN1/ITGA5/COL1A2/TNC/COL6                                                                                                                            | 23    |

|          |                                      |        |          |          |          |          |                                                                                                                                                                                    |    |
|----------|--------------------------------------|--------|----------|----------|----------|----------|------------------------------------------------------------------------------------------------------------------------------------------------------------------------------------|----|
| hsa05205 | Proteoglycans in cancer              | 16/212 | 204/7884 | 0.000114 | 0.001609 | 0.001348 | A2/COL6A3/COL1A1/COL4A2/COL4A1/OSMR/VEGFC/TLR2/IBSP/OSM/PDGFC/LAMB2/PDGFRB/DDIT4/THBS4<br>MMP9/TWIST1/FN1/ITGA5/COL1A2/TIMP3/COL1A1/FLNA/TLR2/PLAU/SDC2/LUM/PLAUR/CTSL/FZD10/WNT5A | 16 |
| hsa04062 | Chemokine signaling pathway          | 15/212 | 189/7884 | 0.000165 | 0.002179 | 0.001824 | CXCL8/CXCL5/CXCL6/CCL18/PPBP/CCL2/CCL4/CXCR2/FGR/CCL7/CXCL11/CXCL9/CXCL13/CCL28/CXCL14                                                                                             | 15 |
| hsa04668 | TNF signaling pathway                | 11/212 | 112/7884 | 0.000199 | 0.002488 | 0.002084 | MMP9/CXCL5/IL1B/MMP3/PTGS2/CXCL6/IL6/VEGFC/CCL2/SELE/MMP14                                                                                                                         | 11 |
| hsa04640 | Hematopoietic cell lineage           | 10/212 | 97/7884  | 0.000261 | 0.003092 | 0.00259  | IL1B/IL6/ITGA5/ITGAM/MME/CD14/CD2/CD38/CD3D/CD8A                                                                                                                                   | 10 |
| hsa05204 | Chemical carcinogenesis              | 9/212  | 82/7884  | 0.000331 | 0.003728 | 0.003122 | PTGS2/CYP1B1/HSD11B1/NAT1/UGT2B15/NAT2/UGT2A3/ADH1C/UGT2B17                                                                                                                        | 9  |
| hsa05165 | Human papillomavirus infection       | 19/212 | 330/7884 | 0.001384 | 0.014828 | 0.012418 | SPP1/THBS2/PTGS2/COMP/FN1/ITGA5/COL1A2/TNC/COL6A2/COL6A3/COL1A1/COL4A2/COL4A1/IBSP/LAMB2/PDGFRB/FZD10/WNT5A/THBS4                                                                  | 19 |
| hsa04620 | Toll-like receptor signaling pathway | 9/212  | 104/7884 | 0.001868 | 0.019101 | 0.015996 | CXCL8/SPP1/IL1B/IL6/TLR2/CCL4/CD14/CXCL11/CXCL9                                                                                                                                    | 9  |

**Table S6.** Results of univariate Cox regression analysis.

|               | GSE39582 Cohort  |          | TCGA Cohort      |          |
|---------------|------------------|----------|------------------|----------|
|               | HR (95% CI)      | <i>p</i> | HR (95% CI)      | <i>p</i> |
| Immunoscore*  | 1.72(1.25,2.35)  | < 0.001  | 2.40(1.56,3.68)  | < 0.001  |
| Age*          | 1.04(1.02–1.06)  | < 0.001  | 1.03(1.01,1.05)  | 0.003    |
| Tumor stage   |                  | < 0.001  |                  | < 0.001  |
| Stage I       | 1.00(reference)  |          | 1.00(reference)  |          |
| Stage II      | 1.54(0.55,4.31)  | 0.407    | 1.72(0.65,4.51)  | 0.274    |
| Stage III     | 1.86(0.67,5.17)  | 0.236    | 2.69(1.02,7.04)  | 0.045    |
| Stage IV      | 7.21(2.36,21.97) | < 0.001  | 6.95(2.69,17.97) | < 0.001  |
| TP53 mutation | 1.25(0.84,1.86)  | 0.268    | 0.67(0.42,1.09)  | 0.815    |

\*Continuous variable. Abbreviation: HR, hazard ratio; CI, confidence interval.

**Table S7.** Results of multivariable Cox regression analysis.

|                    | GSE39582 Cohort  |          | TCGA Cohort      |          |
|--------------------|------------------|----------|------------------|----------|
|                    | HR (95% CI)      | <i>p</i> | HR (95% CI)      | <i>p</i> |
| Immunoscore*       | 1.76(1.26,2.46)  | < 0.001  | 1.95(1.20,3.18)  | 0.007    |
| Age*               | 1.04(1.02–1.06)  | < 0.001  | 1.04(1.02,1.06)  | < 0.001  |
| Tumor stage        |                  | < 0.001  |                  | < 0.001  |
| I                  | 1.00(reference)  |          | 1.00(reference)  |          |
| II                 | 1.35(0.48,3.79)  | 0.567    | 1.72(0.65,4.53)  | 0.273    |
| III                | 1.59(0.57,4.45)  | 0.374    | 2.83(1.06,7.53)  | 0.037    |
| IV                 | 6.34(2.07,19.43) | 0.001    | 6.96(2.64,18.36) | < 0.001  |
| TP53 mutation      |                  | 0.876    |                  | 0.096    |
| TP53 <sup>W</sup>  | 1.00(reference)  |          | 1.00(reference)  |          |
| TP53 <sup>MT</sup> | 1.09(0.72,1.67)  | 0.684    | 0.67(0.42,1.09)  | 0.103    |

\*Continuous variable. Abbreviation: HR, hazard ratio; CI, confidence interval.

**Table S8.** The difference of proportion of immune cell types in low and high score CRC groups.

| <b>Immune Cell Types</b>     | <b>p-Value</b> |
|------------------------------|----------------|
| B cells naive                | 0.0117         |
| B cells memory               | 0.0564         |
| Plasma cells                 | 0.0023         |
| T cells CD8                  | 0.0265         |
| T cells CD4 naive            | 0.0960         |
| T cells CD4 memory resting   | < 0.0001       |
| T cells CD4 memory activated | 0.6003         |
| T cells follicular helper    | 0.5257         |
| T cells regulatory (Tregs)   | 0.9363         |
| T cells gamma delta          | 0.9524         |
| NK cells resting             | 0.25           |
| NK cells activated           | 0.6367         |
| Monocytes                    | 0.0011         |
| Macrophages M0               | < 0.0001       |
| Macrophages M1               | 0.0083         |
| Macrophages M2               | 0.0114         |
| Dendritic cells resting      | 0.7255         |
| Dendritic cells activated    | 0.1437         |
| Mast cells resting           | 0.3106         |
| Mast cells activated         | 0.0443         |
| Eosinophils                  | 0.02762        |
| Neutrophils                  | 0.3409         |
